# Supplementary material for: Efficient access to a dihydropyran-containing macrolide via a transannular oxy-Michael reaction: total synthesis of (+)-aspergillide C
Source: Royal Society of Chemistry journal article supplement (doi:10.1039/c1cc12114f), 2011-01-01

## Supporting Information

### Experimental Data for Compounds

#### General Procedures.

$^1\text{H}$  NMR were measured in  $\text{CDCl}_3$  solution and referenced to TMS (0.00 ppm) or in  $\text{C}_6\text{D}_6$  solution and referenced to  $\text{C}_6\text{D}_5\text{H}$  (7.16 ppm) using JEOL GSX400 (400 MHz), Bruker AV400N (400 MHz) and Bruker AV500 (500 MHz) spectrometers.  $^{13}\text{C}$  NMR were measured in  $\text{CDCl}_3$  solution and referenced to  $\text{CDCl}_3$  (77.0 ppm) or in  $\text{C}_6\text{D}_6$  solution and referenced to  $\text{C}_6\text{D}_6$  (128.0 ppm) using JEOL GSX400 (100 MHz), Bruker AV400N (100MHz), Bruker AV500 (125 MHz) spectrometers. Chemical shifts are reported in ppm (from TMS). When peak multiplicities are reported, the following abbreviations are used: s, singlet; d, doublet; t, triplet; q, quartet; quint, quintet; m, multiplet; br, broadened. Optical rotations were determined on JAS.CO P-1010-GT. IR spectra were measured on JAS.CO FT/IR-410 spectrometer. Mass spectra were recorded on Waters MICRO MASS LCT-Premier spectrometers. Column chromatography was performed on silica gel 60N (KANTO CHEMICAL, spherical neutral, 63-210 mesh), and flash column chromatography was performed on silica gel (FUJI SILISIA CHEMICAL, spherical neutral, 40-50  $\mu\text{m}$ ) using indicated solvent. Thin layer chromatography was performed on precoated plates (0.25 mm, silica gel Merck Kieselgel 60F<sub>245</sub>), and compounds were visualized with UV light and *p*-anisaldehyde stain. All melting points were measured with BÜCHI 535 and Yanaco MP-500D melting point apparatus and are uncorrected. All non-aqueous reactions were performed in oven-dried glassware under positive pressure of argon or nitrogen, unless otherwise noted. Reaction mixture was stirred magnetically. Solvents were freshly distilled prior to use or purchased from Kanto Kagaku or Aldrich: tetrahydrofuran (THF) was distilled from sodium benzophenone ketyl or purchased from Kanto Kagaku (Tetrahydrofuran, Dehydrated Stabilizer free); methylene chloride ( $\text{CH}_2\text{Cl}_2$ ) was distilled from calcium hydride or purchased from Kanto Kagaku (Methylene chloride, Dehydrated); ether ( $\text{Et}_2\text{O}$ ) was purchased from Kanto Kagaku (Diethyl ether, Dehydrated); acetonitrile ( $\text{CH}_3\text{CN}$ ) was distilled from calcium hydride and kept over 4Å molecular sieves; pyridine and triethylamine ( $\text{Et}_3\text{N}$ ) were distilled from KOH and kept over KOH tablets.

**[4-(*tert*-Butyldimethylsilyloxy)-6,8-dioxabicyclo[3.2.1]oct-2-en-7-yl]methanol (7)**

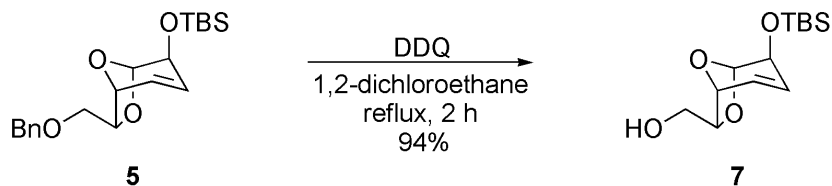

To a stirred solution of **5**<sup>1</sup> (302 mg, 0.834 mmol) in 1,2-dichloroethane (15.0 mL) was added DDQ (410 mg, 1.81 mmol) at room temperature, and then the mixture was heated to reflux. After being stirred for 2 h, the reaction mixture was cooled to room temperature and added saturated aq. NaHCO<sub>3</sub>. After being stirred for 2 h at room temperature, resultant mixture was extracted with CH<sub>2</sub>Cl<sub>2</sub>. The combined extracts were washed with saturated aq. NaHCO<sub>3</sub>, brine, dried over MgSO<sub>4</sub>, filtered and concentrated in vacuo. The residue was purified by silica gel chromatography (hexane / AcOEt = 70 / 30) to afford **7** (214 mg, 94%) as a colorless oil.

$[\alpha]_{\text{D}}^{28} +135.5$  (c 1.81, CHCl<sub>3</sub>); IR (neat) 3420, 2955, 2930, 2885, 2857, 1089, 1064 cm<sup>-1</sup>; <sup>1</sup>H-NMR (400 MHz, CDCl<sub>3</sub>)  $\delta$  6.25 (ddd, *J* = 10.0, 4.8, 1.2 Hz, 1H), 5.72 (dq, *J* = 10.0, 2.0 Hz, 1H), 5.45 (t, *J* = 1.5 Hz, 1H), 4.51 (d, *J* = 4.8 Hz, 1H), 3.91 (t, *J* = 6.0 Hz, 1H), 3.74 (dt, *J* = 3.6, 1.2 Hz, 1H), 3.63–3.53 (m, 2H), 1.75 (dd, *J* = 6.4, 5.0 Hz, OH, D<sub>2</sub>O exchangeable, 1H), 0.91 (s, 9H), 0.12 (s, 3H), 0.12 (s, 3H); <sup>13</sup>C-NMR (100 MHz, CDCl<sub>3</sub>)  $\delta$  129.6, 127.2, 103.5, 80.4, 71.5, 66.5, 63.9, 25.8, 18.3, –4.6, –4.7; HRMS (ESI) Calcd for C<sub>13</sub>H<sub>25</sub>O<sub>4</sub>Si ([M+H]<sup>+</sup>) 273.1522, Found 273.1521.

<sup>1</sup> M. Kanematsu, M. Yoshida and K. Shishido, *Angew. Chem., Int. Ed.*, 2011, **50**, 2618.

***tert*-Butyl-(7-iodomethyl-6,8-dioxabicyclo[3.2.1]oct-2-en-4-yloxy)dimethylsilane (**8**)**

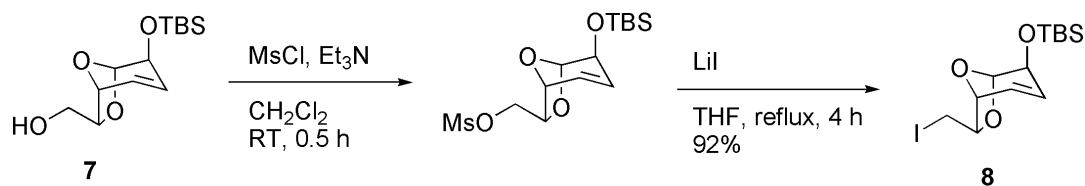

To a stirred solution of **7** (493 mg, 1.81 mmol) in  $\text{CH}_2\text{Cl}_2$  (15.0 mL) were added  $\text{Et}_3\text{N}$  (0.76 mL, 5.46 mmol) and  $\text{MsCl}$  (0.28 mL, 3.62 mmol) at 0 °C. After being stirred at room temperature for 0.5 h, the reaction mixture was quenched with saturated aq.  $\text{NaHCO}_3$  and extracted with  $\text{Et}_2\text{O}$ . The combined extracts were washed with brine, dried over  $\text{MgSO}_4$ , filtered and concentrated in vacuo to give crude as a colorless oil, which was used to the next reaction without further purification.

To a stirred solution of crude in THF (10.0 mL) was added  $\text{LiI}$  (2.45 g, 18.3 mmol) at room temperature, and then the mixture was heated to reflux. After being stirred for 4 h, the reaction mixture was diluted with  $\text{Et}_2\text{O}$  and added with saturated aq.  $\text{NaHCO}_3$  / saturated aq.  $\text{Na}_2\text{S}_2\text{O}_3$  (5/1, v/v). The resultant mixture was stirred at room temperature for 0.5 h, and then extracted with  $\text{Et}_2\text{O}$ . The combined extracts were washed with brine, dried over  $\text{MgSO}_4$ , filtered and concentrated in vacuo. The residue was purified by silica gel column chromatography (hexane /  $\text{AcOEt}$  = 95 / 5) to afford **8** (633 mg, 92% for 2 steps) as a colorless solid.

Mp: 104.5–105.5 °C;  $[\alpha]_{\text{D}}^{28} +112.5$  ( $c$  1.22,  $\text{CHCl}_3$ ); IR (neat) 2926, 2879, 2855, 1255, 1088  $\text{cm}^{-1}$ ;  $^1\text{H}$ -NMR (400 MHz,  $\text{CDCl}_3$ )  $\delta$  6.18 (ddd,  $J$ =10.0, 4.8, 1.0 Hz, 1H), 5.74 (ddd,  $J$ =9.8, 4.0, 2.0 Hz, 1H), 5.48 (t,  $J$ =5.6 Hz, 1H), 4.63 (d,  $J$ =4.8 Hz, 1H), 4.06 (dd,  $J$ =9.2, 5.6 Hz, 1H), 3.71 (dt,  $J$ =3.6, 1.2 Hz, 1H), 3.17 (dd,  $J$ =9.6, 5.6, Hz, 1H), 3.10 (dd,  $J$ =10.2, 9.8 Hz, 1H), 0.91 (s, 9H), 0.12 (s, 3H) 0.11 (s, 3H);  $^{13}\text{C}$ -NMR (100 MHz,  $\text{CDCl}_3$ )  $\delta$  129.3, 127.4, 104.1, 80.6, 73.3, 65.9, 25.8, 18.3, 6.6, −4.6, −4.7; HRMS (ESI) Calcd for  $\text{C}_{13}\text{H}_{23}\text{O}_3\text{NaSi}$  ( $[\text{M}+\text{Na}]^+$ ) 405.0359, Found 405.0354.

**3-(*tert*-Butyldimethylsilyloxy)-6-vinyl-3,6-dihydro-2*H*-pyran-2-ol (**3**)**

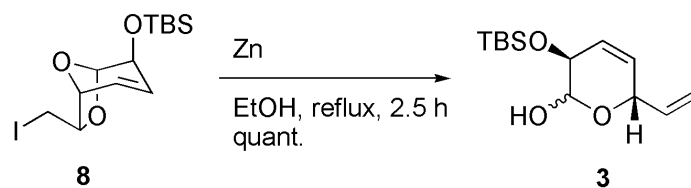

To a stirred solution of **8** (633 mg, 1.66 mmol) in EtOH (19.0 mL) was added Zn powder (1.07 g, 16.6 mmol) at room temperature, and then the mixture was heated to reflux. After being stirred for 2.5 h, the resultant solution was filtered and concentrated in vacuo. The residue was purified by silica gel column chromatography (hexane / AcOEt = 80 / 20) to afford **3** (427 mg, quant., ca. 2.7 : 1 mixture of diastereomers;  $^1\text{H}$  NMR) as a colorless oil.

IR (neat) 3421, 2954, 2929, 2886, 2857, 1472, 1361, 1113, 877, 838, 780  $\text{cm}^{-1}$ ;  $^1\text{H}$ -NMR (400 MHz,  $\text{CDCl}_3$ )  $\delta$  5.90–5.77 (m, 1.27H), 5.71–5.59 (m, 1.73H), 5.33 (dt,  $J = 17.2$ , 1.6 Hz, 0.73H), 5.31 (dt,  $J = 17.2$ , 1.6 Hz, 0.27H), 5.22 (dt,  $J = 12.8$ , 1.2 Hz, 0.27H), 5.19 (dt,  $J = 10.4$ , 1.2 Hz, 0.73H), 5.15 (dd,  $J = 5.6$ , 3.6 Hz, 0.27H), 4.82–4.80 (m, 0.27H), 4.76 (dd,  $J = 5.6$ , 4.0 Hz, 0.73H), 4.77–4.74 (m, 0.73H), 4.22–4.20 (m, 0.27H), 4.09–4.08 (m, 0.73H), 3.41 (d,  $J = 6.0$  Hz, OH,  $\text{D}_2\text{O}$  exchangeable, 0.27H), 2.79 (dd,  $J = 5.6$ , 2.0 Hz, OH,  $\text{D}_2\text{O}$  exchangeable, 0.73H), 0.93 (s, 2.4H), 0.92 (s, 6.6H), 0.13 (s, 1.6H), 0.11 (s, 4.4H);  $^{13}\text{C}$ -NMR (100 MHz,  $\text{CDCl}_3$ )  $\delta$  136.5, 136.0, 130.3, 128.8, 128.6, 125.3, 116.7, 97.0, 90.6, 75.8, 70.3, 69.4, 64.8, 25.8, 18.2, –4.5, –4.7, –4.8; HRMS (ESI) Calcd for  $\text{C}_{13}\text{H}_{24}\text{O}_3\text{NaSi}$  ( $[\text{M}+\text{Na}]^+$ ) 279.1392, Found 279.1394.

**6-[5-(*tert*-Butyldimethylsilyloxy)-6-hydroxy-5,6-dihydro-2*H*-pyran-2-yl]-1-methylhex-5-enyl acetate (**10**)**

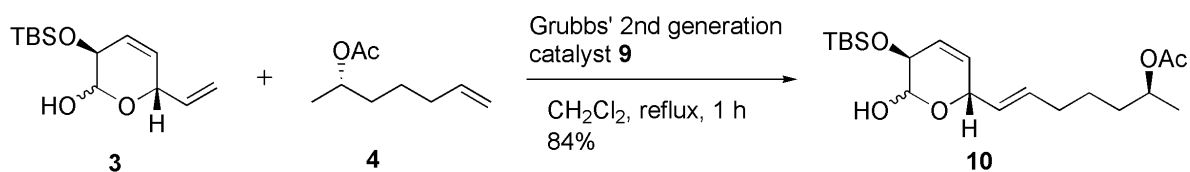

To a stirred solution of **3** (10.8 mg, 42.1  $\mu\text{mol}$ ) and **4** (32.9 mg, 0.211 mmol) in  $\text{CH}_2\text{Cl}_2$  (0.5 mL) was added Grubbs' 2nd generation catalyst **9** (1.7 mg, 2.00  $\mu\text{mol}$ ) at room temperature, and then the reaction mixture was heated to reflux. After being stirred for 1 h, the reaction mixture was concentrated in vacuo and purified by silica gel column chromatography (hexane / AcOEt = 90 / 10) to afford **10** (13.6 mg, 84%, ca. 4 : 1 mixture of diastereomers;  $^1\text{H}$  NMR) as a yellow oil.

IR (neat) 3520, 2931, 2860, 1733, 1383, 1249, 839, 781  $\text{cm}^{-1}$ ;  $^1\text{H}$ -NMR (400 MHz,  $\text{CDCl}_3$ )  $\delta$  5.80 (dt,  $J$  = 10.4, 1.6 Hz, 0.2H), 5.74 (dt,  $J$  = 15.2, 6.4 Hz, 0.8H), 5.66–5.54 (m, 2H), 5.49–5.39 (m, 1H), 5.13 (dd,  $J$  = 5.2, 4.0 Hz, 0.2H), 4.94–4.83 (m, 1H), 4.78–4.64 (m, 1.8H), 4.22–4.18 (m, 0.2H), 4.09–4.03 (m, 0.8H), 3.38 (d,  $J$  = 5.6 Hz, OH,  $\text{D}_2\text{O}$  exchangeable, 0.2H), 2.76 (d,  $J$  = 5.6 Hz, OH,  $\text{D}_2\text{O}$  exchangeable, 0.8H), 2.08–2.03 (m, 2H), 2.02 (s, 3H), 1.63–1.33 (m, 4H), 1.20 (d,  $J$  = 6.4 Hz, 3H), 0.92 (d,  $J$  = 2.4 Hz, 9H), 0.13 (s, 6H);  $^{13}\text{C}$ -NMR (100 MHz,  $\text{CDCl}_3$ )  $\delta$  170.7, 133.8, 133.5, 130.9, 129.4, 128.8, 128.4, 128.2, 125.0, 97.0, 90.6, 75.6, 70.8, 70.0, 69.4, 64.8, 35.4, 32.0, 31.9, 25.8, 25.7, 24.7, 24.6, 21.3, 19.9, 18.2, 18.1, –4.5, –4.7, –4.8; HRMS (ESI) Calcd for  $\text{C}_{20}\text{H}_{36}\text{NaO}_5\text{Si}$  ( $[\text{M}+\text{Na}]^+$ ) 407.2230, Found 407.2227.

**13-Acetoxy-4-(*tert*-butyldimethylsilyloxy)-7-hydroxytetradeca-2,5,8-trienoic acid methyl ester (11)**

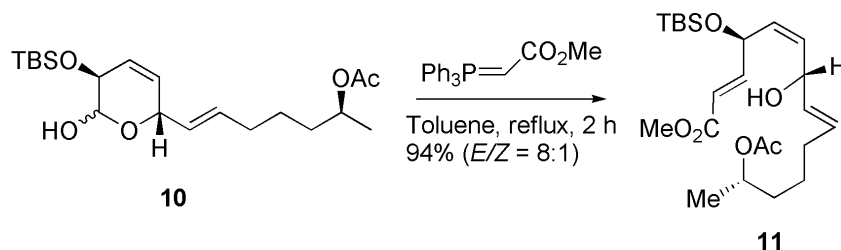

To a stirred solution of **10** (9.7 mg, 25.2  $\mu\text{mol}$ ) in toluene (0.3 mL) was added methyl (triphenylphosphoranylidene) acetate (42.2 mg, 0.126 mmol) at room temperature, and then the mixture was heated to reflux. After being stirred for 2 h, the resultant mixture was concentrated in vacuo. The residue was purified by silica gel column chromatography (hexane / AcOEt = 90 / 10) to afford the **Z-isomer** (1.2 mg, 10%) as a colorless oil and **11** (9.2 mg, 84%) as a colorless oil;

**Z-isomer**

$[\alpha]_{\text{D}}^{31} -91.4$  (*c* 1.03,  $\text{CHCl}_3$ ); IR (neat) 3476, 2931, 2857, 1722, 1257, 1059, 826  $\text{cm}^{-1}$ ;  $^1\text{H-NMR}$  (400 MHz,  $\text{CDCl}_3$ )  $\delta$  6.28 (dd, *J* = 9.2, 7.2 Hz, 1H), 6.14 (dd, *J* = 11.2, 8.8 Hz, 1H), 5.69 (dd, *J* = 11.2, 1.2 Hz, 1H), 5.60 (dt, *J* = 15.2, 7.6 Hz, 1H), 5.52–5.41 (m, 3H), 5.10 (t, *J* = 5.6 Hz, 1H), 4.94–4.83 (m, 1H), 3.72 (s, 3H), 2.23 (d, *J* = 3.2 Hz, OH,  $\text{D}_2\text{O}$  exchangeable, 1H), 2.03–1.98 (m, 5H), 1.56–1.30 (m, 4H), 1.19 (d, *J* = 6.8 Hz, 3H), 0.89 (s, 9H), 0.09 (s, 3H), 0.08 (s, 3H);  $^{13}\text{C-NMR}$  (100 MHz,  $\text{CDCl}_3$ )  $\delta$  170.7, 166.2, 149.7, 132.8, 131.3, 131.2, 130.7, 116.9, 70.8, 68.7, 65.0, 51.4, 35.4, 32.0, 25.8, 25.0, 21.3, 19.9, 18.1, –4.7; HRMS (ESI) Calcd for  $\text{C}_{23}\text{H}_{41}\text{O}_6\text{Si}$  ( $[\text{M}+\text{H}]^+$ ) 441.2672, Found 441.2677.

**E-enoate (11)**

$[\alpha]_{\text{D}}^{32} +64.7$  (*c* 0.34,  $\text{CHCl}_3$ ); IR (neat) 3496, 2931 2858, 1730, 1252  $\text{cm}^{-1}$ ;  $^1\text{H-NMR}$  (400 MHz,  $\text{CDCl}_3$ )  $\delta$  6.77 (dd, *J* = 15.6, 4.0 Hz, 1H), 6.02 (dd, *J* = 15.2, 1.2 Hz, 1H), 5.68 (dt, *J* = 15.2, 3.2 Hz, 1H), 5.54–5.49 (m, 1H), 5.49 (ddd, *J* = 10.8, 8.0, 0.8 Hz, 1H), 5.35 (ddd, *J* = 10.8, 8.0, 0.8 Hz, 1H), 5.19–5.16 (m, 1H), 4.92–4.87 (m, 2H), 3.73 (s, 3H), 2.06 (q, *J* = 6.8 Hz, 2H), 2.03 (s, 3H), 1.72 (s, OH,  $\text{D}_2\text{O}$  exchangeable, 1H), 1.53–1.39 (m, 4H), 1.21 (d, *J* = 6.4 Hz, 3H), 0.91 (s, 9H), 0.09 (s, 3H), 0.08 (s, 3H);  $^{13}\text{C-NMR}$  (100 MHz,  $\text{CDCl}_3$ )  $\delta$  170.7, 167.0, 148.8, 132.2, 131.7, 131.4, 131.2, 119.3, 70.7, 69.3, 68.4, 51.5, 35.4, 31.9, 25.7, 24.7, 21.3, 19.9, 18.2, –4.6, –4.9; HRMS (ESI) Calcd for  $\text{C}_{23}\text{H}_{41}\text{O}_6\text{Si}$  ( $[\text{M}+\text{H}]^+$ ) 441.2672, Found 441.2677.

**4,7-Bis-(*tert*-butyldimethylsilyloxy)-13-hydroxytetradeca-2,5,8-trienoic acid (**13**)**

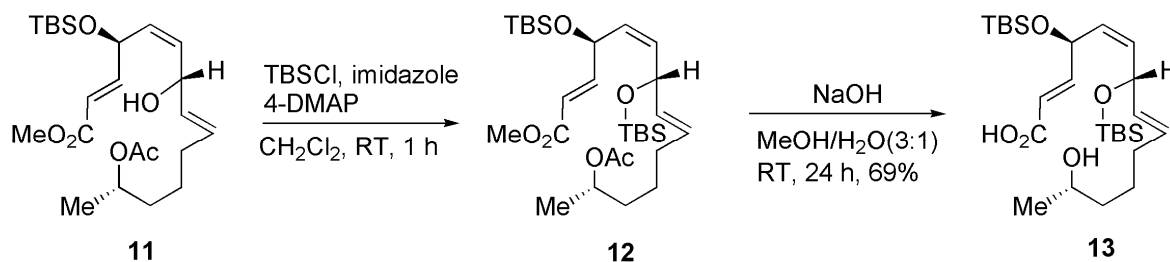

To a stirred solution of **11** (5.4 mg, 12.2  $\mu\text{mol}$ ) in  $\text{CH}_2\text{Cl}_2$  (0.3 mL) were added imidazole (2.5 mg, 36.8  $\mu\text{mol}$ ), TBSCl (3.7 mg, 24.5  $\mu\text{mol}$ ) and 4-DMAP (0.14 mg, 1.22  $\mu\text{mol}$ ) at 0  $^\circ\text{C}$ . After being stirred at room temperature for 1 h, the reaction mixture was quenched with  $\text{H}_2\text{O}$  and extracted with  $\text{CHCl}_3$ . The combined extracts were washed with brine, dried over  $\text{MgSO}_4$ , filtered and concentrated in vacuo to give **12** as a colorless oil, which was used to the next reaction without further purification.

To a stirred solution of crude **12** in  $\text{MeOH}/\text{H}_2\text{O}$  (0.04 mL, 3/1, v/v) was added NaOH (2.5 mg, 61.3  $\mu\text{mol}$ ) at room temperature. After being stirred at room temperature for 24 h, the reaction mixture was quenched with  $\text{H}_2\text{O}$  and extracted with  $\text{AcOEt}$ . The combined extracts were washed with brine, dried over  $\text{MgSO}_4$ , filtered and concentrated. The residue was purified by silica gel column chromatography ( $\text{CHCl}_3$  /  $\text{MeOH}$  = 99 / 1) to afford **13** (4.2 mg, 69%) as a colorless oil.

$[\alpha]_{\text{D}}^{26} +73.4$  ( $c$  2.08,  $\text{CHCl}_3$ ); IR (neat) 3379, 2953, 2927, 2856, 1699, 1654, 1255, 1075, 837, 776  $\text{cm}^{-1}$ ;  $^1\text{H}$ -NMR (400 MHz,  $\text{CDCl}_3$ )  $\delta$  6.86 (dd,  $J$  = 15.2, 4.0 Hz, 1H), 6.01 (d,  $J$  = 15.2 Hz, 1H), 5.57 (dt,  $J$  = 15.2, 6.8 Hz, 1H), 5.52–5.40 (m, 2H), 5.25 (ddd,  $J$  = 11.2, 7.6, 1.2 Hz, 1H), 5.20–5.12 (m, 1H), 4.85 (t,  $J$  = 7.2 Hz, 1H), 3.83–3.82 (m, 1H), 2.06–2.05 (m, 2H), 1.51–1.42 (m, 4H), 1.17 (d,  $J$  = 4.4 Hz, 3H), 0.91 (s, 9H), 0.88 (s, 9H), 0.09 (d,  $J$  = 1.6 Hz, 6H), 0.09 (s, 3H), 0.07 (s, 3H), OH protons were not detected;  $^{13}\text{C}$ -NMR (100 MHz,  $\text{CDCl}_3$ )  $\delta$  170.4, 150.6, 133.3, 132.2, 131.3, 129.3, 118.9, 70.9, 68.7, 68.2, 38.7, 32.1, 25.8, 25.4, 22.9, 18.2, –4.2, –4.5, –4.6, –4.8; HRMS (ESI) Calcd for  $\text{C}_{26}\text{H}_{51}\text{O}_5\text{Si}_2$  ( $[\text{M}+\text{H}]^+$ ) 499.3275, Found 499.3278.

**5,8-Bis-(*tert*-butyldimethylsilyloxy)-14-methyloxacyclotetradeca-3,6,9-trien-2-one (14)**

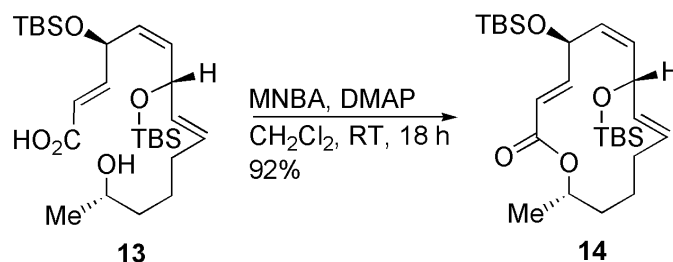

To a stirred solution of **13** (37.0 mg, 74.2  $\mu\text{mol}$ ) in  $\text{CH}_2\text{Cl}_2$  (5.0 mL) were taken up and added dropwise to a solution of 2-methyl-6-nitro benzoic acid anhydride (30.6 mg, 89.0  $\mu\text{mol}$ ) and 4-DMAP (21.7 mg, 0.178 mmol) in  $\text{CH}_2\text{Cl}_2$  (45.0 mL) over a period of 18 h at room temperature. After being stirred at the same temperature for 1 h, the reaction mixture was quenched with saturated aq.  $\text{NaHCO}_3$ , and then extracted with  $\text{CH}_2\text{Cl}_2$ . The combined extracts were washed with brine, dried over  $\text{MgSO}_4$ , filtered and concentrated in vacuo. The residue was purified by silica gel column chromatography (hexane /  $\text{AcOEt}$  = 95 / 5) to afford **14** (32.8 mg, 92%) as a colorless oil.

$[\alpha]_{\text{D}}^{31} +92.8$  (*c* 1.50,  $\text{CHCl}_3$ ); IR (neat) 2930, 2857, 1720, 1254, 1127, 1060, 837, 778  $\text{cm}^{-1}$ ;  $^1\text{H-NMR}$  (400 MHz,  $\text{CDCl}_3$ )  $\delta$  7.05 (dd,  $J$  = 15.2, 3.6 Hz, 1H), 5.87 (dd,  $J$  = 15.2, 1.6 Hz, 1H), 5.68 (dt,  $J$  = 15.6, 6.8 Hz, 1H), 5.45 (dd,  $J$  = 15.6, 6.4 Hz, 1H), 5.41–5.33 (m, 2H), 5.15 (s, 1H), 4.77 (t,  $J$  = 6.8 Hz, 1H), 4.72–4.64 (m, 1H), 2.15–1.88 (m, 2H), 1.87–1.66 (m, 2H), 1.53–1.42 (m, 2H), 1.26 (d,  $J$  = 6.4 Hz, 3H), 0.92 (s, 9H), 0.90 (s, 9H), 0.09 (s, 3H), 0.09 (s, 3H), 0.08 (s, 3H), 0.07 (s, 3H);  $^{13}\text{C-NMR}$  (100 MHz,  $\text{CDCl}_3$ )  $\delta$  166.4, 149.5, 132.2, 131.9, 131.8, 131.5, 117.5, 72.0, 71.0, 69.0, 34.6, 32.9, 25.9, 25.8, 24.5, 20.3, 18.3, 18.2, –4.4, –5.0; HRMS (ESI) Calcd for  $\text{C}_{26}\text{H}_{48}\text{NaO}_4\text{Si}_2$  ( $[\text{M}+\text{Na}]^+$ ) 503.2989, Found 503.2993.

**5,8-Dihydroxy-14-methyloxacyclotetradeca-3,6,9-trien-2-one (2)**

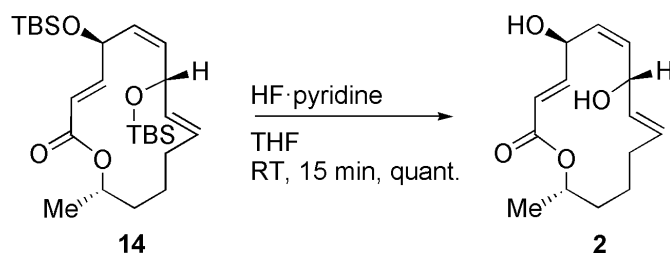

To a stirred solution of **14** (6.5 mg, 13.5  $\mu\text{mol}$ ) in THF (0.5 mL) at 0 °C was added HF·pyridine (70.0  $\mu\text{L}$ ). After being stirred for 15 min at room temperature, the reaction mixture was quenched with saturated aq.  $\text{NaHCO}_3$  at 0 °C, and then extracted with AcOEt. The combined extracts were washed with saturated aq.  $\text{CuSO}_4$ , brine, and dried over  $\text{MgSO}_4$ , filtered and concentrated in vacuo. The residue was purified by silica gel column chromatography (hexane / AcOEt = 50 / 50) to afford **2** (3.4 mg, quant.) as a colorless oil.

$[\alpha]_{\text{D}}^{28} +188.2$  ( $c$  0.68,  $\text{CHCl}_3$ ); IR (neat) 3362, 2974, 2931, 1698, 1261, 1008, 976  $\text{cm}^{-1}$ ;  $^1\text{H-NMR}$  (400 MHz,  $\text{CDCl}_3$ )  $\delta$  7.03 (dd,  $J = 15.6, 4.4$  Hz, 1H), 5.90 (dd,  $J = 15.6, 2.0$  Hz, 1H), 5.86 (ddd,  $J = 15.6, 9.2, 5.6$  Hz, 1H), 5.54 (dd,  $J = 11.2, 4.4$  Hz, 1H), 5.49 (dd,  $J = 15.2, 7.6$  Hz, 1H), 5.46 (ddd,  $J = 10.8, 9.6, 2.4$  Hz, 1H), 5.26–5.25 (m, 1H), 4.82 (t,  $J = 8.4$  Hz, 1H), 4.75 (dtd,  $J = 16.0, 6.0, 2.0$  Hz, 1H), 2.32 (brs, OH,  $\text{D}_2\text{O}$  exchangeable, 1H), 2.13–1.95 (m, 2H), 1.80 (brs, OH,  $\text{D}_2\text{O}$  exchangeable, 1H), 1.87–1.73 (m, 2H), 1.54–1.48 (m, 1H), 1.26 (d,  $J = 6.0$ , 3H), 1.15–1.08 (m, 1H);  $^{13}\text{C-NMR}$  (100 MHz,  $\text{CDCl}_3$ )  $\delta$  166.1, 148.3, 134.4, 132.1, 131.2, 130.3, 118.3, 72.0, 70.6, 68.4, 34.5, 32.8, 24.4, 20.2; HRMS (ESI) Calcd for  $\text{C}_{14}\text{H}_{20}\text{O}_4\text{Na}$  ( $[\text{M}+\text{Na}]^+$ ) 275.1259, Found 275.1262.

### Aspergillide C (1)

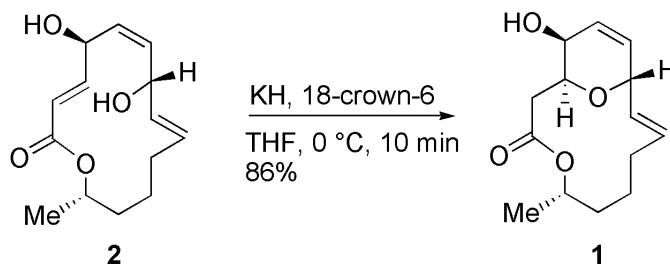

To a stirred suspension of KH (1.7 mg, 30% in oil, 12.5  $\mu\text{mol}$ ) in THF (0.1 mL) were added 18-Crown-6 (7.9 mg, 29.7  $\mu\text{mol}$ ) and **2** (1.5 mg, 5.95  $\mu\text{mol}$ ) in THF (0.2 mL) at 0  $^{\circ}\text{C}$ . After being stirred at the same temperature for 10 min, the reaction mixture was quenched with saturated aq.  $\text{NH}_4\text{Cl}$  and extracted with AcOEt. The combined extracts were washed with brine, dried over  $\text{MgSO}_4$ , filtered and concentrated in vacuo. The residue was purified by silica gel column chromatography (hexane / AcOEt = 70 / 30) to afford **1** (1.3 mg, 86%) as a colorless solid.

Mp: 104.5–105.5  $^{\circ}\text{C}$ ; (lit.<sup>2</sup> mp: 115.5–116  $^{\circ}\text{C}$ );  $[\alpha]_{\text{D}}^{29} +83.8$  ( $c$  0.33, MeOH) {lit.<sup>3</sup>  $[\alpha]_{\text{D}}^{25} +66.2$  ( $c$  0.19, MeOH), lit.<sup>2</sup>  $[\alpha]_{\text{D}}^{25} +83.0$  ( $c$  0.14, MeOH), lit.<sup>4</sup>  $[\alpha]_{\text{D}}^{28} +77.5$  ( $c$  0.11, MeOH)}; IR (neat) 3411, 2924, 2852, 1732, 1456, 1375, 1193  $\text{cm}^{-1}$ ;  $^1\text{H}$ -NMR (500 MHz,  $\text{C}_6\text{D}_6$ )  $\delta$  5.94 (dddd,  $J$  = 15.5, 9.5, 6.0, 2.0 Hz, 1H), 5.74 (ddd,  $J$  = 10.5, 6.0, 2.0 Hz, 1H), 5.41 (dd,  $J$  = 10.0, 3.5 Hz, 1H), 5.18 (dd,  $J$  = 15.5, 4.0 Hz, 1H), 5.15–5.13 (m, 1H), 4.46–4.45 (m, 1H), 4.03 (dt,  $J$  = 11.5, 1.5 Hz, 1H), 3.22 (dd,  $J$  = 10.5, 5.0 Hz, 1H), 2.87 (dd,  $J$  = 13.5, 11.5 Hz, 1H), 2.25 (dd,  $J$  = 13.5, 2.0 Hz, 1H), 1.96 (dddd,  $J$  = 13.0, 9.5, 6.0, 2.0 Hz, 1H), 1.63–1.54 (m, 2H), 1.45–1.36 (m, 1H), 1.32–1.25 (m, 1H), 1.24 (brs, OH,  $\text{D}_2\text{O}$  exchangeable, 1H), 1.20–1.12 (m, 1H), 0.99 (d,  $J$  = 6.5 Hz, 3H);  $^{13}\text{C}$ -NMR (100 MHz,  $\text{CDCl}_3$ )  $\delta$  170.0, 135.0, 131.8, 128.5, 126.2, 72.0, 69.8, 69.5, 64.5, 38.8, 32.0, 31.0, 23.7, 18.7; HRMS (ESI) Calcd for  $\text{C}_{14}\text{H}_{21}\text{O}_4$  ( $[\text{M}+\text{H}]^+$ ) 253.1440, Found 253.1444.

<sup>2</sup> T. Nagasawa and S. Kuwahara, *Org. Lett.*, 2009, **11**, 761.

<sup>3</sup> K. Kito, R. Ookura, S. Yoshida, M. Namikoshi, T. Ooi and T. Kusumi, *Org. Lett.*, 2008, **10**, 225.

<sup>4</sup> M. Kanematsu, M. Yoshida and K. Shishido, *Tetrahedron Lett.*, 2011, **52**, 1372.

**3-*epi*-Aspergillide C (**15**)**

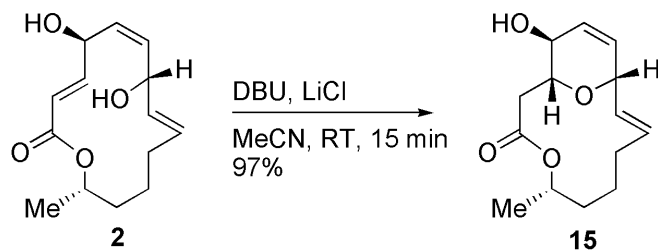

To a stirred solution of **4** (3.0 mg, 1.20  $\mu\text{mol}$ ) in MeCN (0.2 mL) were added LiCl (5.0 mg, 11.9  $\mu\text{mol}$ ) and DBU (16.7  $\mu\text{L}$ , 11.9  $\mu\text{mol}$ ) at room temperature. After being stirred at the same temperature for 15 min, the reaction mixture was quenched with saturated aq.  $\text{NH}_4\text{Cl}$  and extracted with AcOEt. The combined extracts were washed with brine, dried over  $\text{MgSO}_4$ , filtered and concentrated in vacuo. The residue was purified by silica gel column chromatography (hexane / AcOEt = 60 / 40) to afford **15** (2.9 mg, 97%) as a colorless oil.

$[\alpha]_{\text{D}}^{31} +80.2$  (*c* 0.49,  $\text{CHCl}_3$ ); IR (neat) 3366, 2926, 2853, 1732, 1263, 1066, 1028  $\text{cm}^{-1}$ ;  $^1\text{H}$ -NMR (500 MHz,  $\text{CDCl}_3$ )  $\delta$  6.07 (dddd,  $J = 10.0, 6.0, 2.5, 1.0$  Hz, 1H), 5.99 (dd,  $J = 10.0, 3.0$  Hz, 1H), 5.82 (dddd,  $J = 15.5, 7.0, 6.0, 1.5$  Hz, 1H), 5.58 (ddt,  $J = 16.0, 6.5, 1.5$  Hz, 1H), 5.08–5.04 (m, 1H), 4.67 (d,  $J = 4.5$  Hz, 1H), 4.59 (dd,  $J = 12.5, 3.0$  Hz, 1H), 3.67 (dd,  $J = 10.0, 9.5$  Hz, 1H), 2.53 (dd,  $J = 16.0, 11.5$  Hz, 1H), 2.37 (dd,  $J = 16.5, 3.5$  Hz, 1H), 2.23–2.03 (m, 2H), 2.00 (d,  $J = 9.6$  Hz, OH,  $\text{D}_2\text{O}$  exchangeable, 1H), 1.86–1.78 (m, 1H), 1.75–1.56 (m, 3H), 1.20 (d,  $J = 6.6$  Hz, 3H);  $^{13}\text{C}$ -NMR (100 MHz,  $\text{CDCl}_3$ )  $\delta$  170.0, 134.8, 131.8, 130.1, 124.2, 73.6, 70.9, 69.7, 64.2, 38.7, 32.7, 30.8, 21.6, 18.8; HRMS (ESI) Calcd for  $\text{C}_{14}\text{H}_{21}\text{O}_4$  ( $[\text{M}+\text{H}]^+$ ) 253.1440, Found 253.1435.

**Interconversion of 3-*epi*-aspergillide C (**15**) to aspergillide C (**1**)**

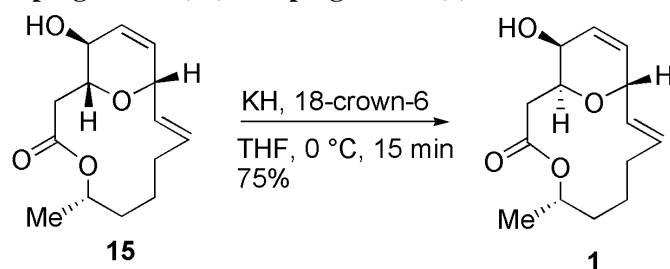

To a stirred suspension of KH (0.9 mg, 30% in oil, 6.66  $\mu\text{mol}$ ) in THF (0.1 mL) were added 18-Crown-6 (4.2 mg, 15.9  $\mu\text{mol}$ ) and 3-*epi*-aspergillide C (**15**) (0.8 mg, 3.17  $\mu\text{mol}$ ) in THF (0.2 mL) at 0  $^\circ\text{C}$ . After being stirred for 15 min, the reaction mixture was quenched with saturated aq.  $\text{NH}_4\text{Cl}$  and extracted with AcOEt. The combined extracts were washed with brine, dried over  $\text{MgSO}_4$ , filtered and concentrated in vacuo. The residue was purified by silica gel column chromatography (hexane / AcOEt = 60 / 40) to afford aspergillide C (**1**) (0.6 mg, 75%) as a colorless solid.

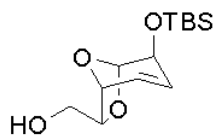

7

<sup>1</sup>H NMR (400 MHz) in CDCl<sub>3</sub>

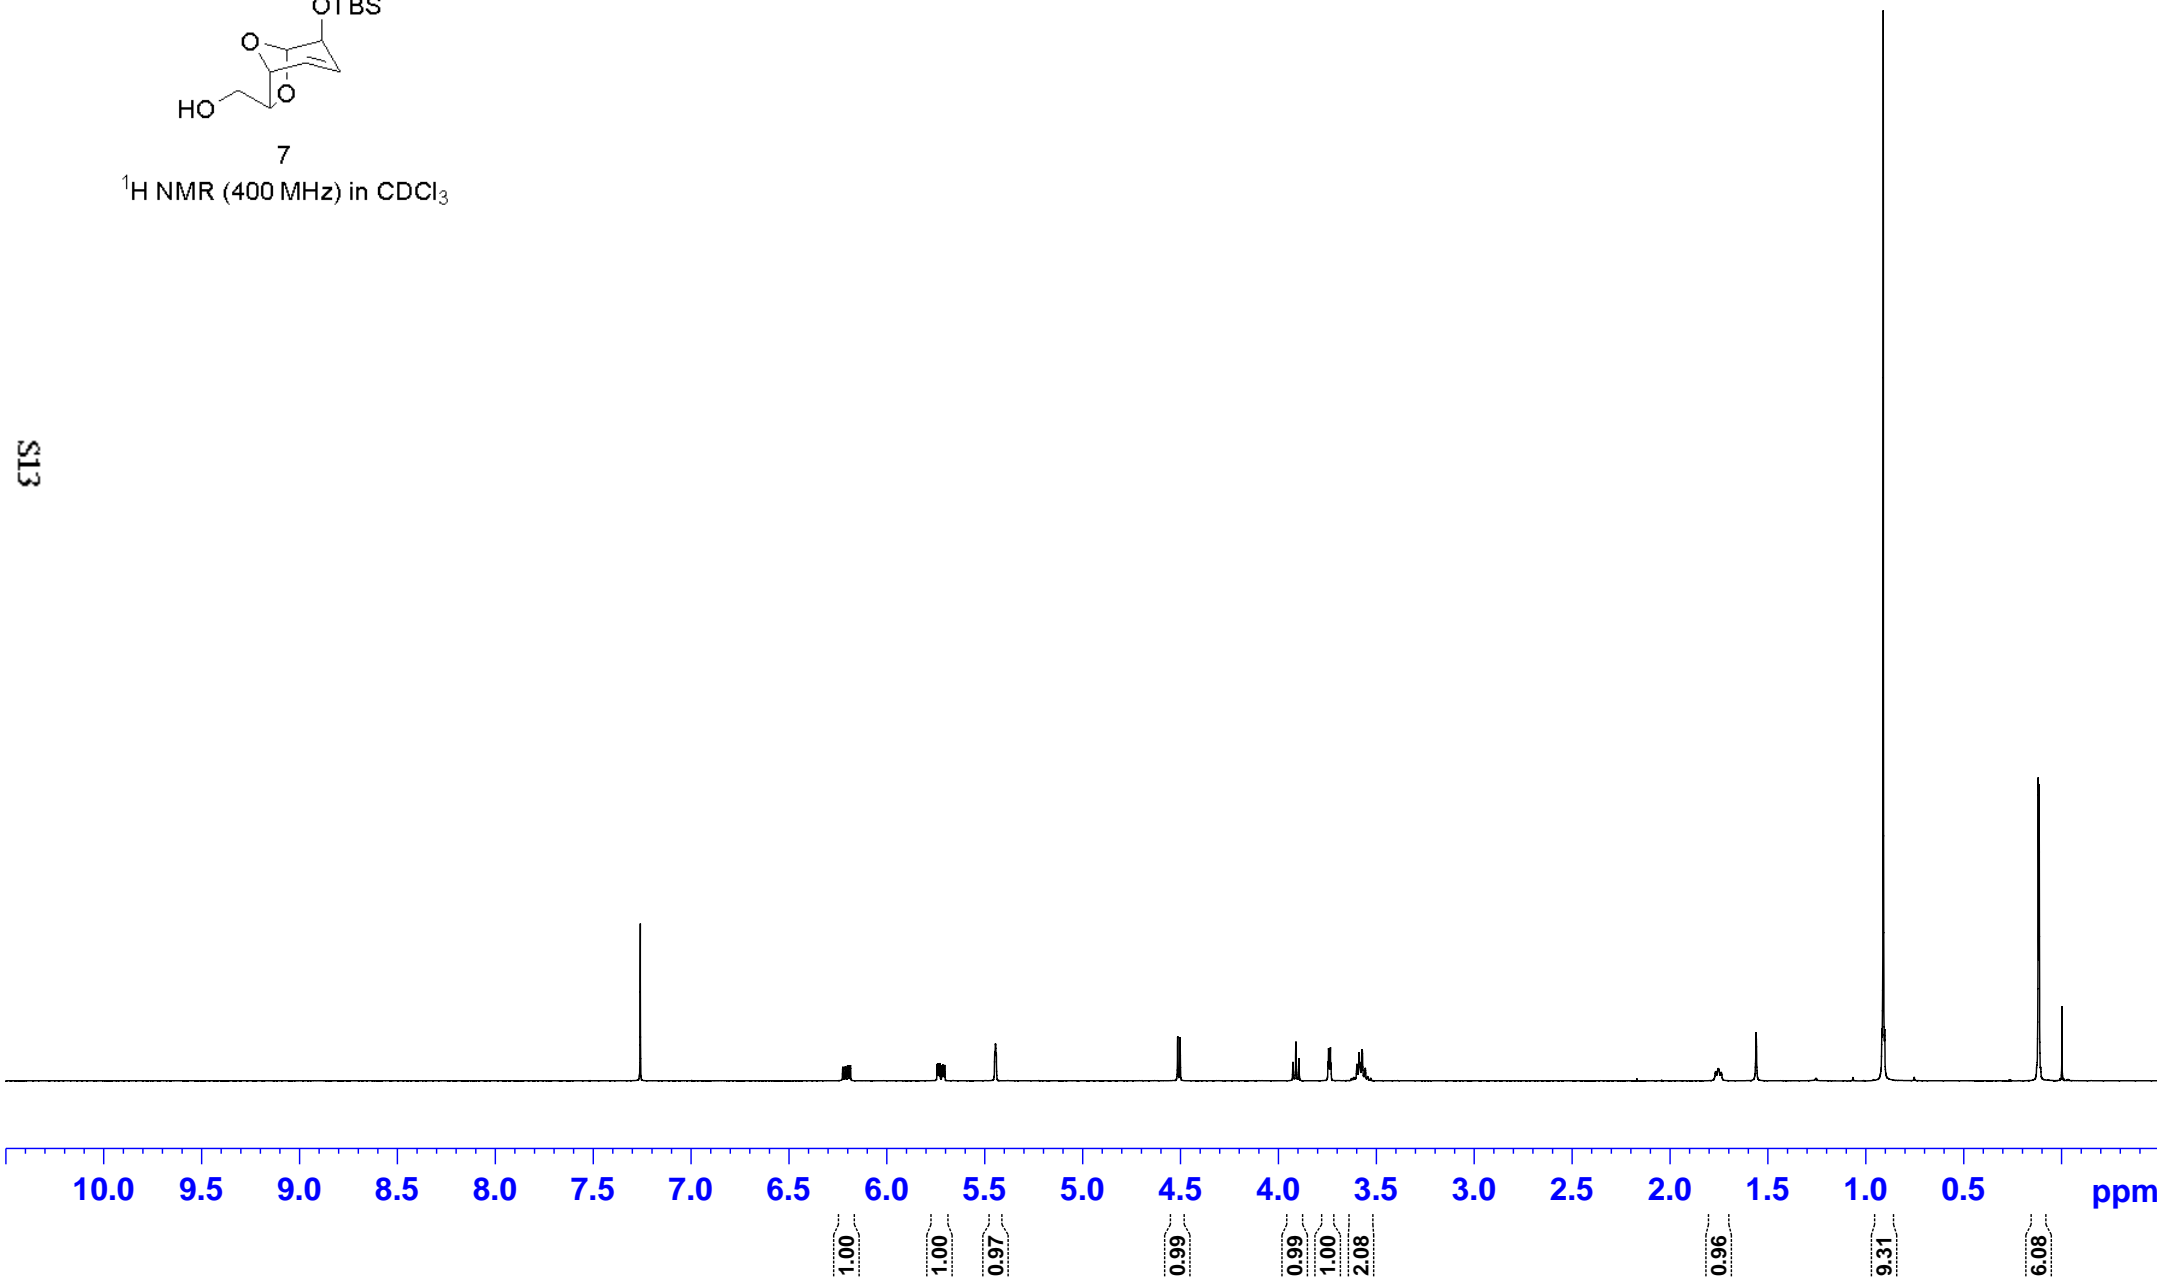

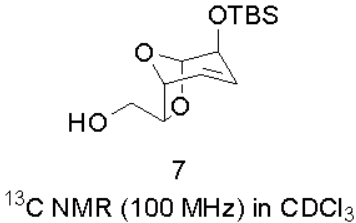

S14

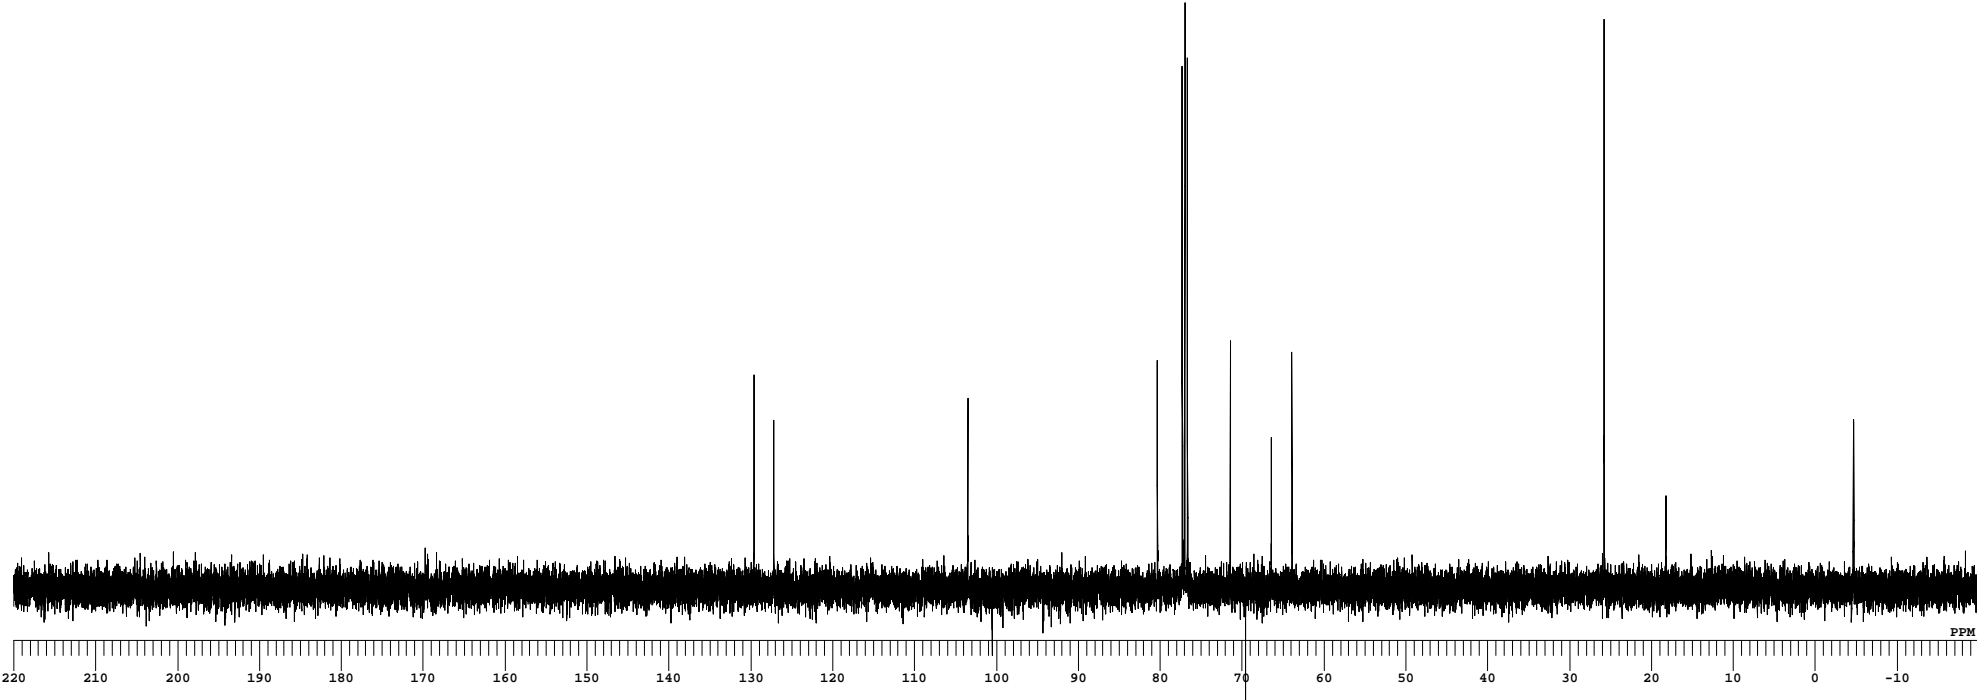

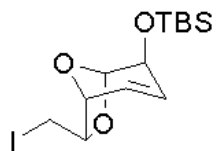

8

<sup>1</sup>H NMR (400MHz) in CDCl<sub>3</sub>

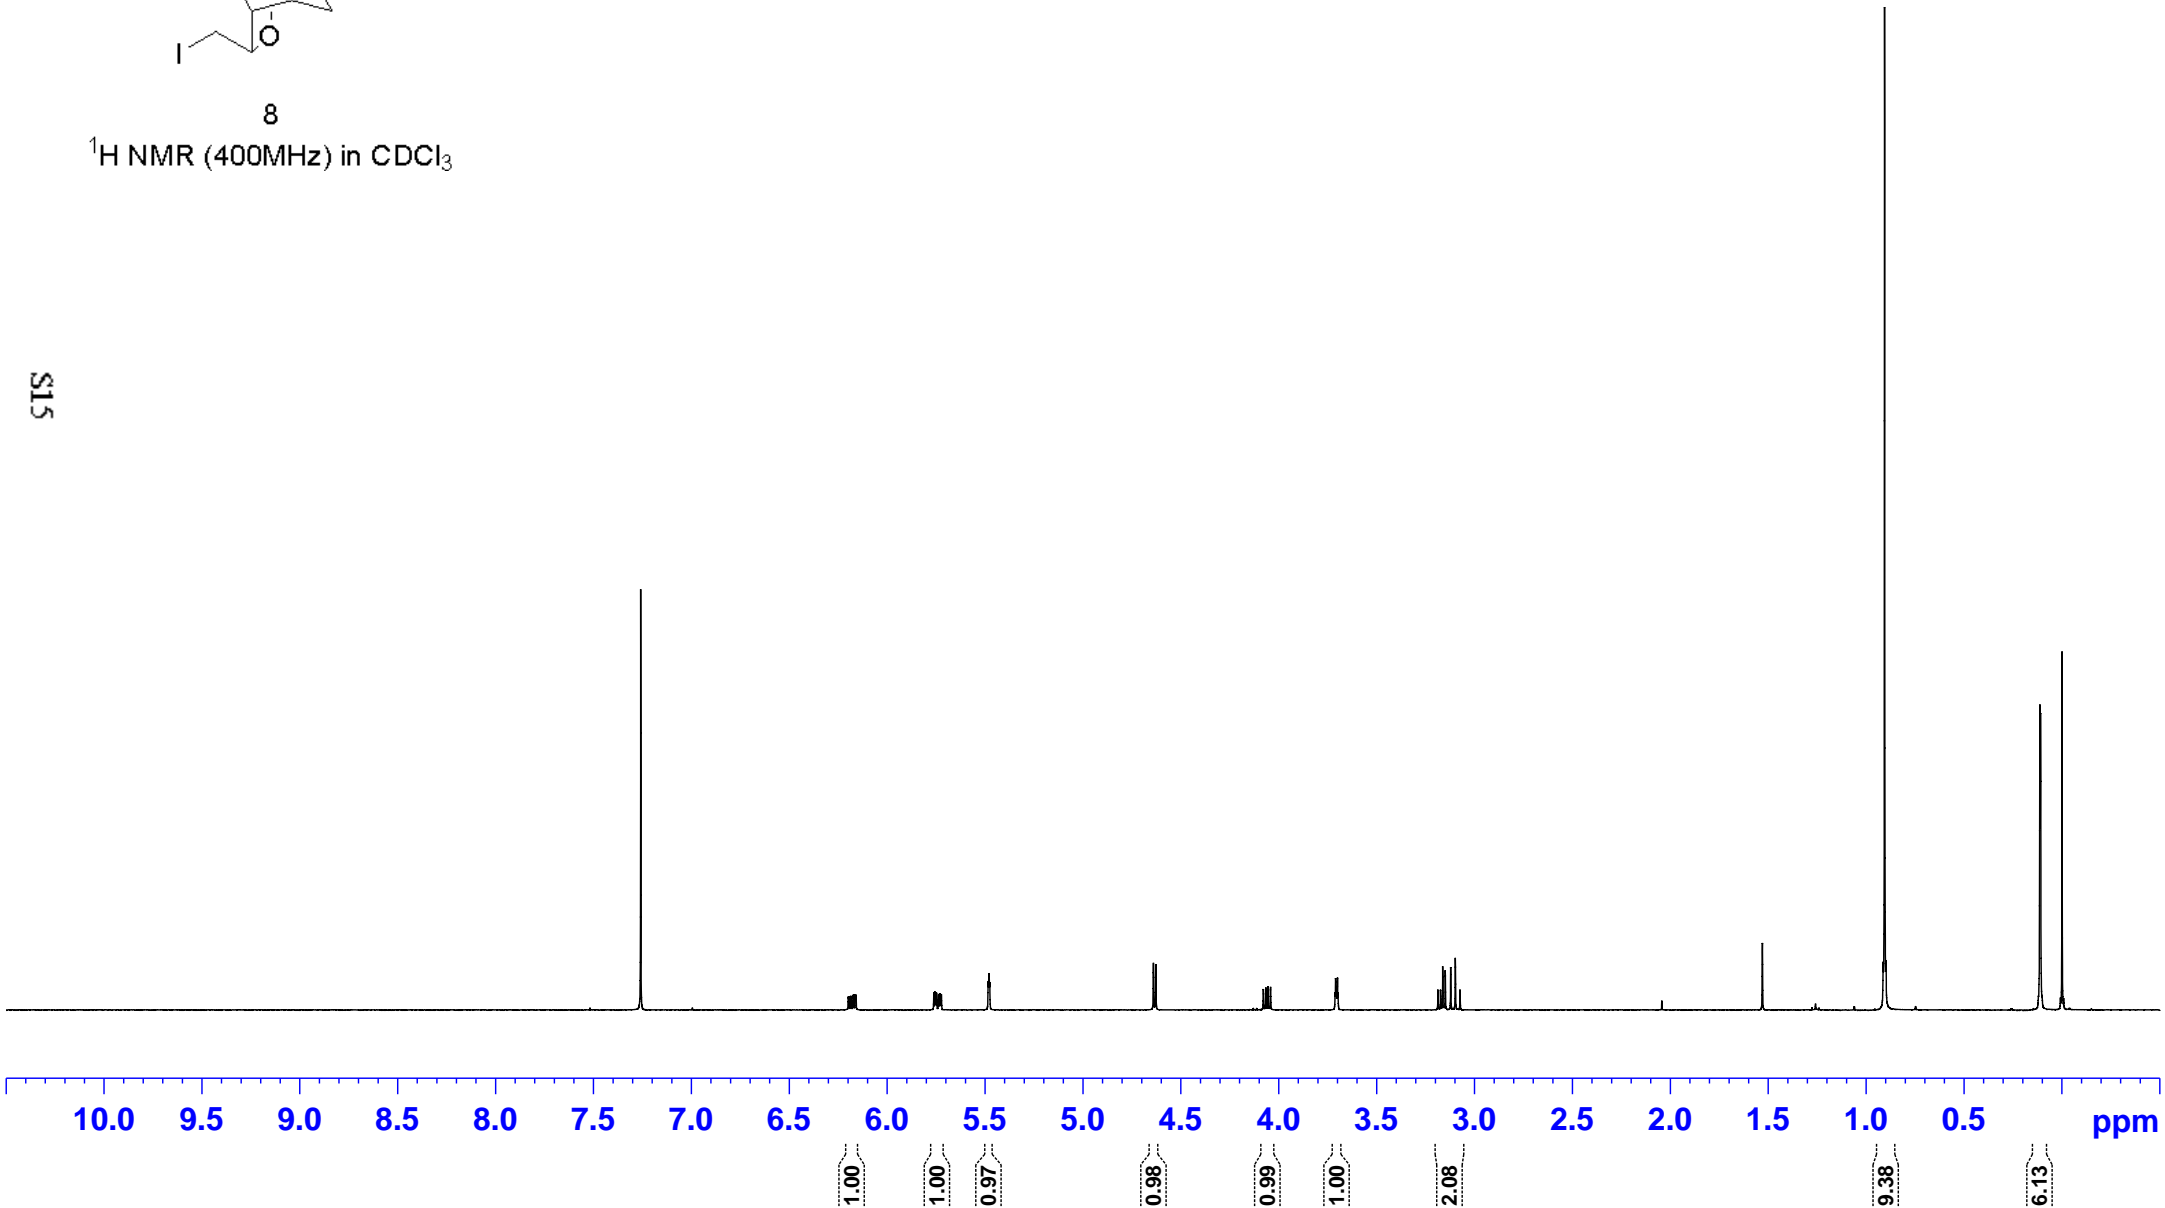

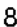 $^{13}\text{C}$  NMR (100MHz) in  $\text{CDCl}_3$

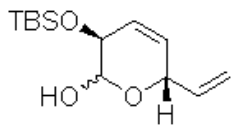

3 (*dr* = 2.7 : 1)  
<sup>1</sup>H NMR (400MHz) in CDCl<sub>3</sub>

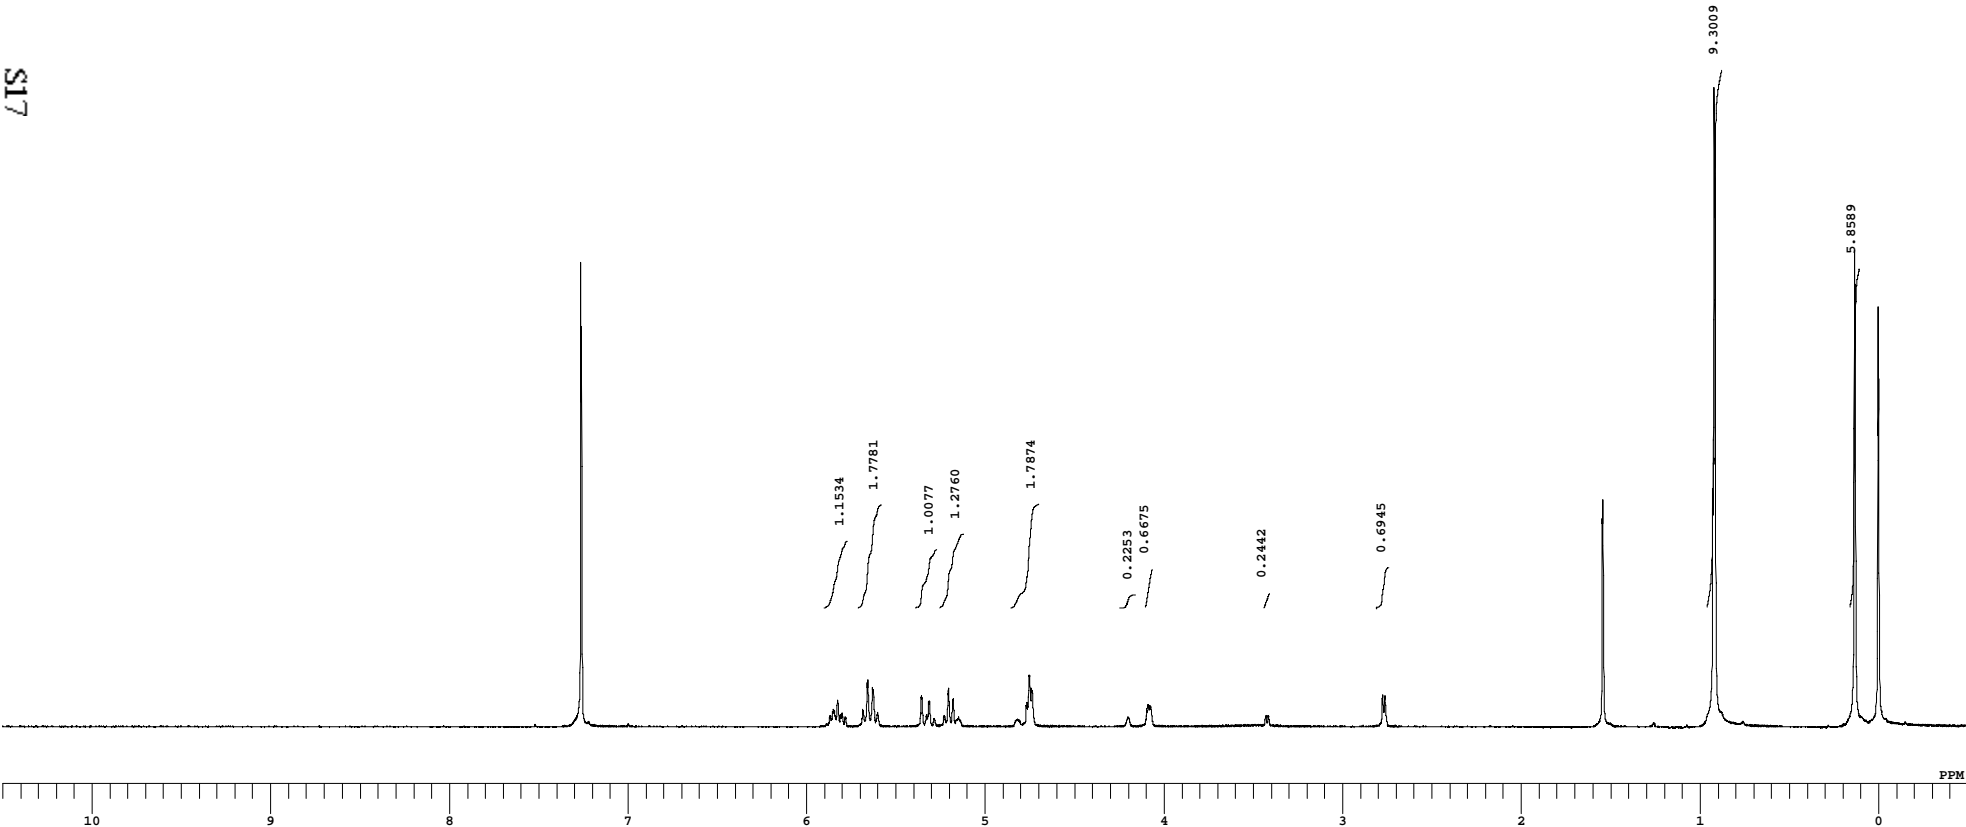

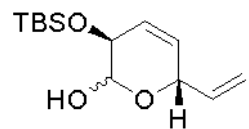 $^{13}\text{C}$  NMR (100MHz) in  $\text{CDCl}_3$ 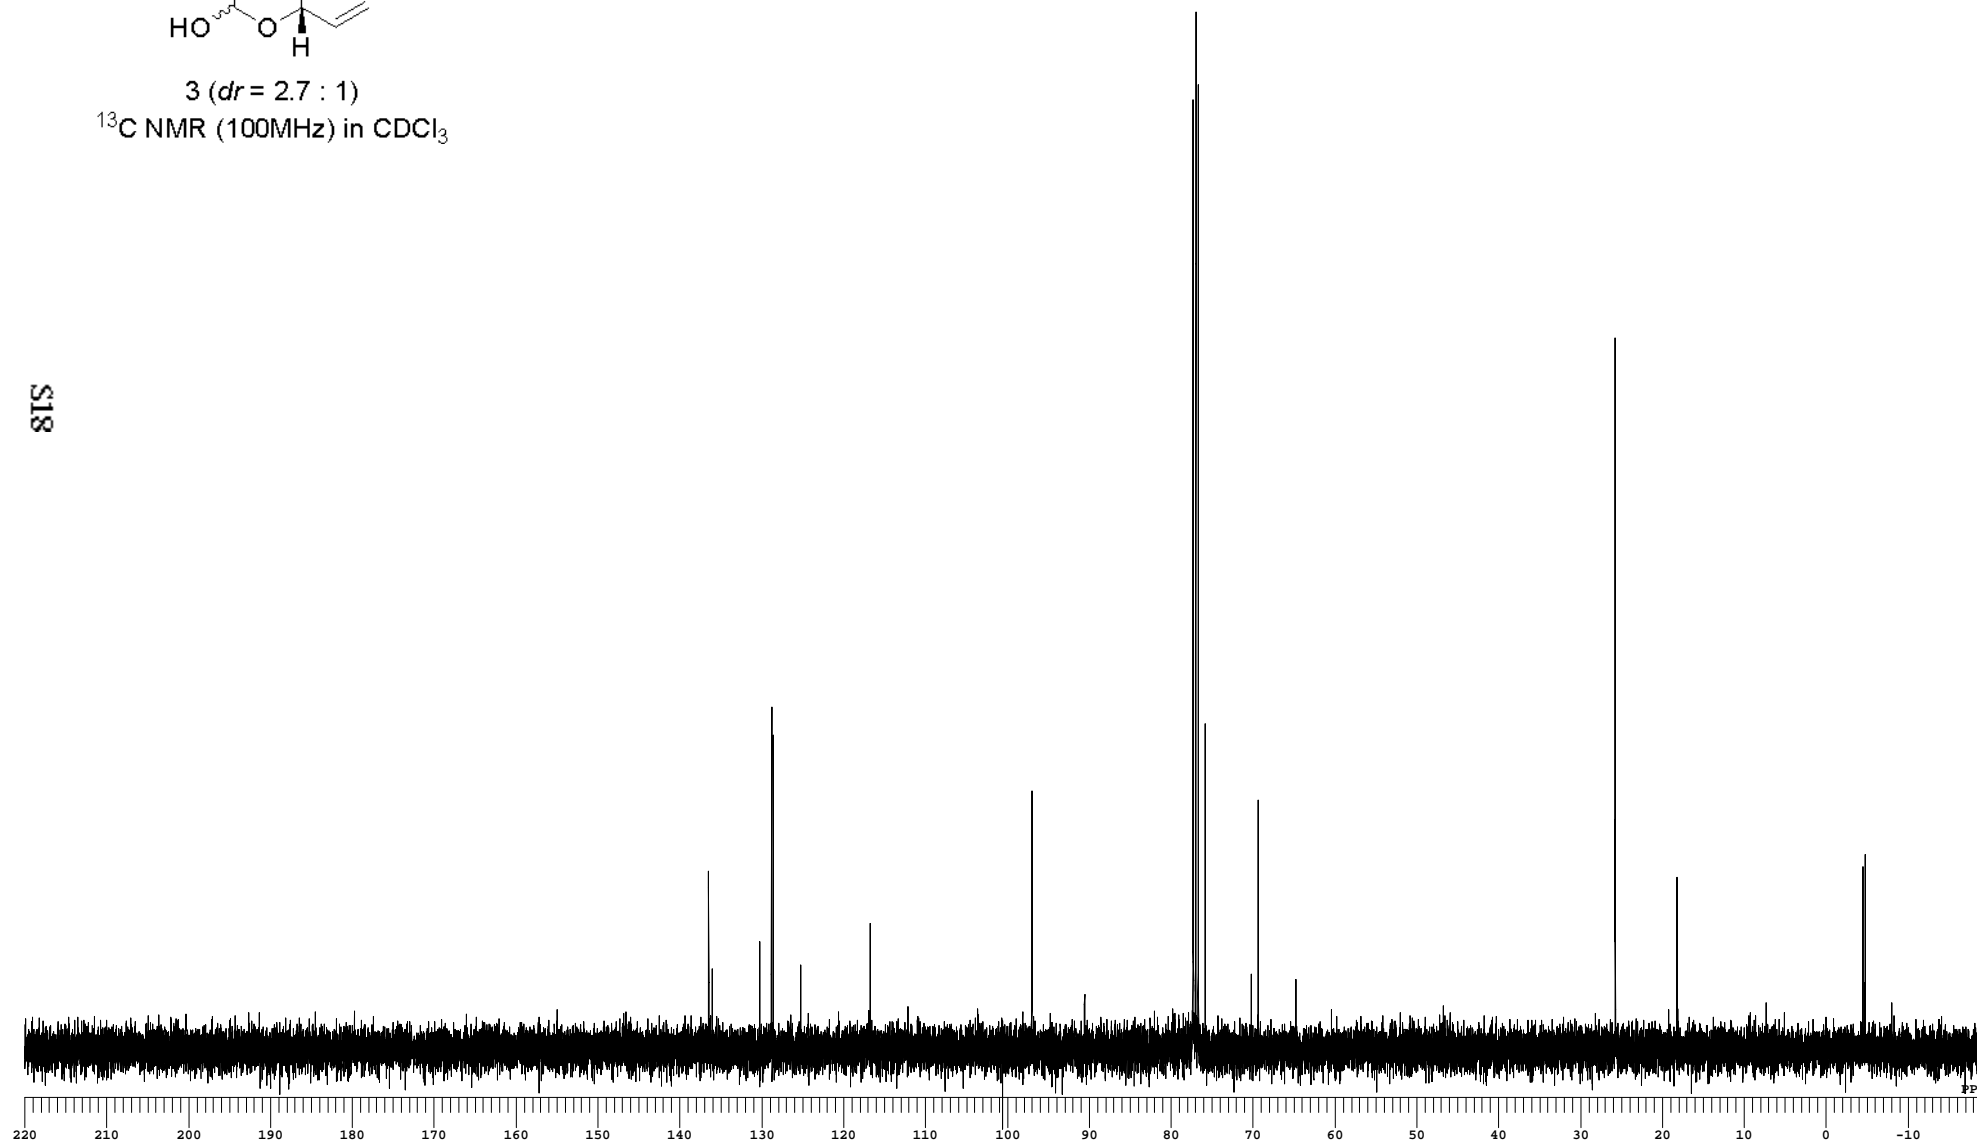

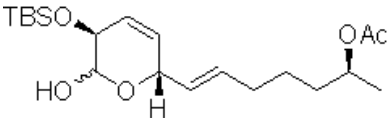

10 (*dr* = 4 : 1)  
<sup>1</sup>H NMR (400MHz) in  
CDCl<sub>3</sub>

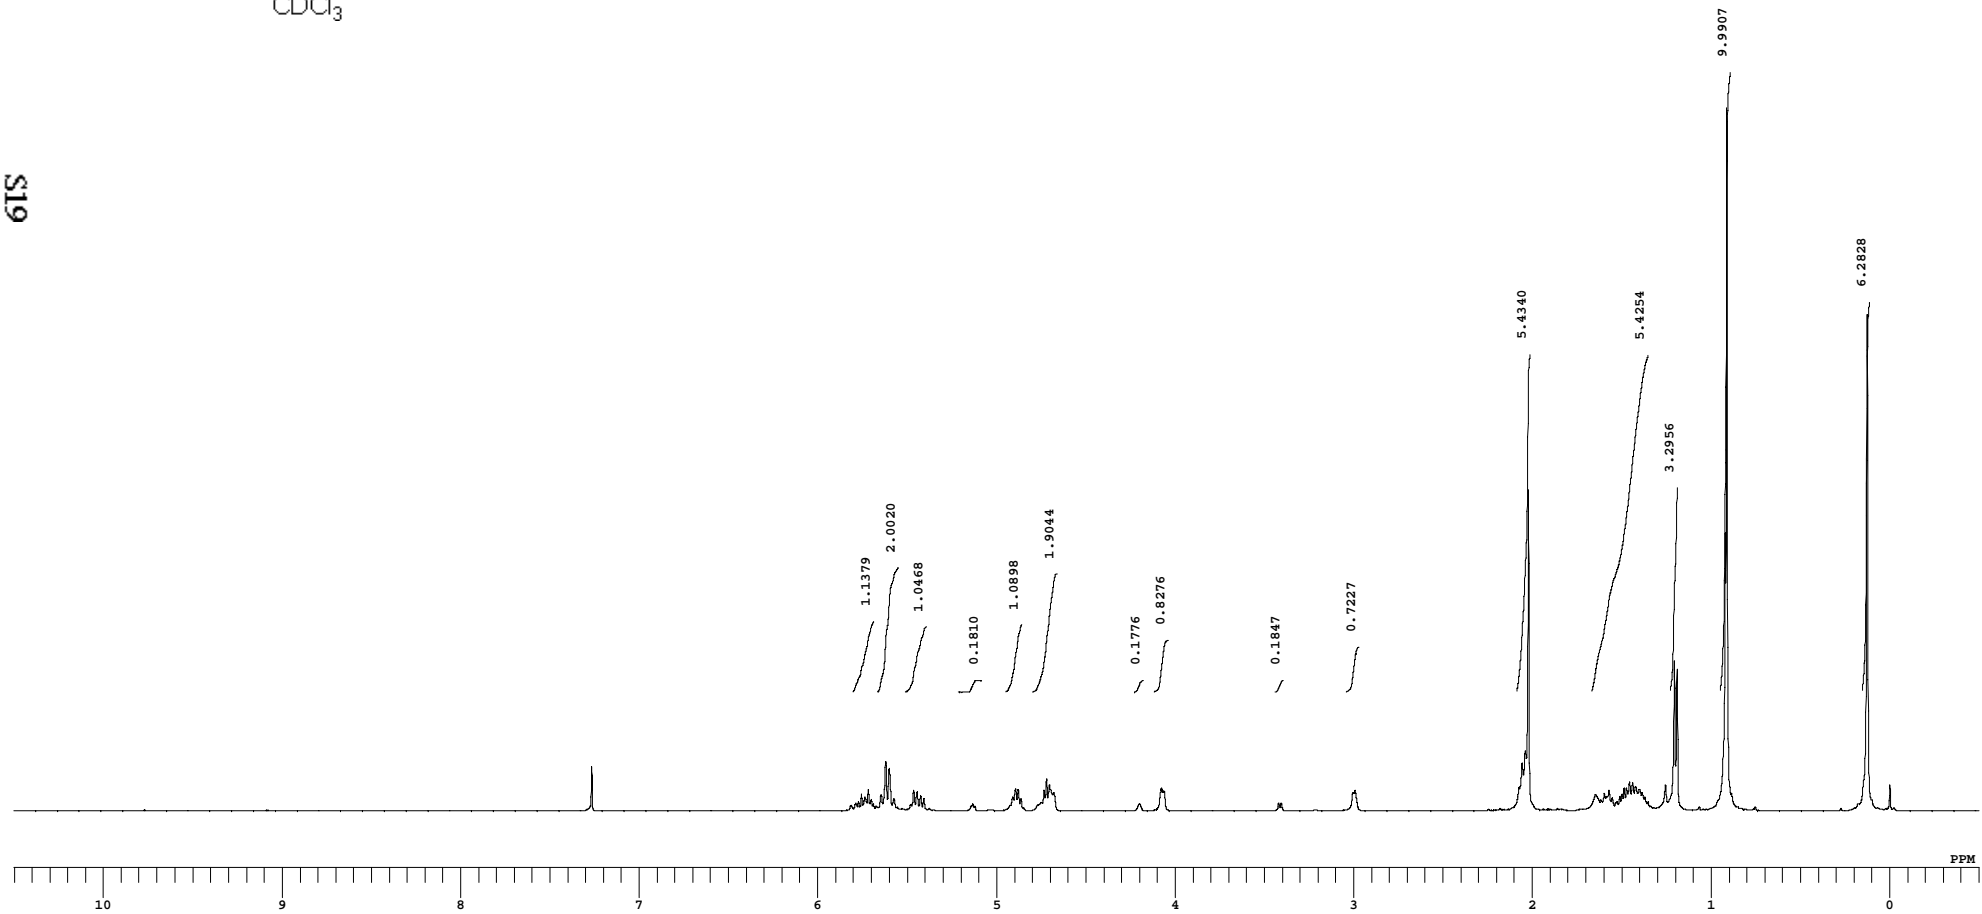

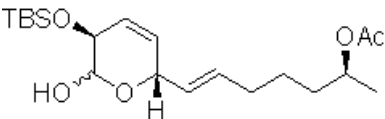

10 (*dr* = 4 : 1)

<sup>13</sup>C NMR (100MHz) in CDCl<sub>3</sub>

S20

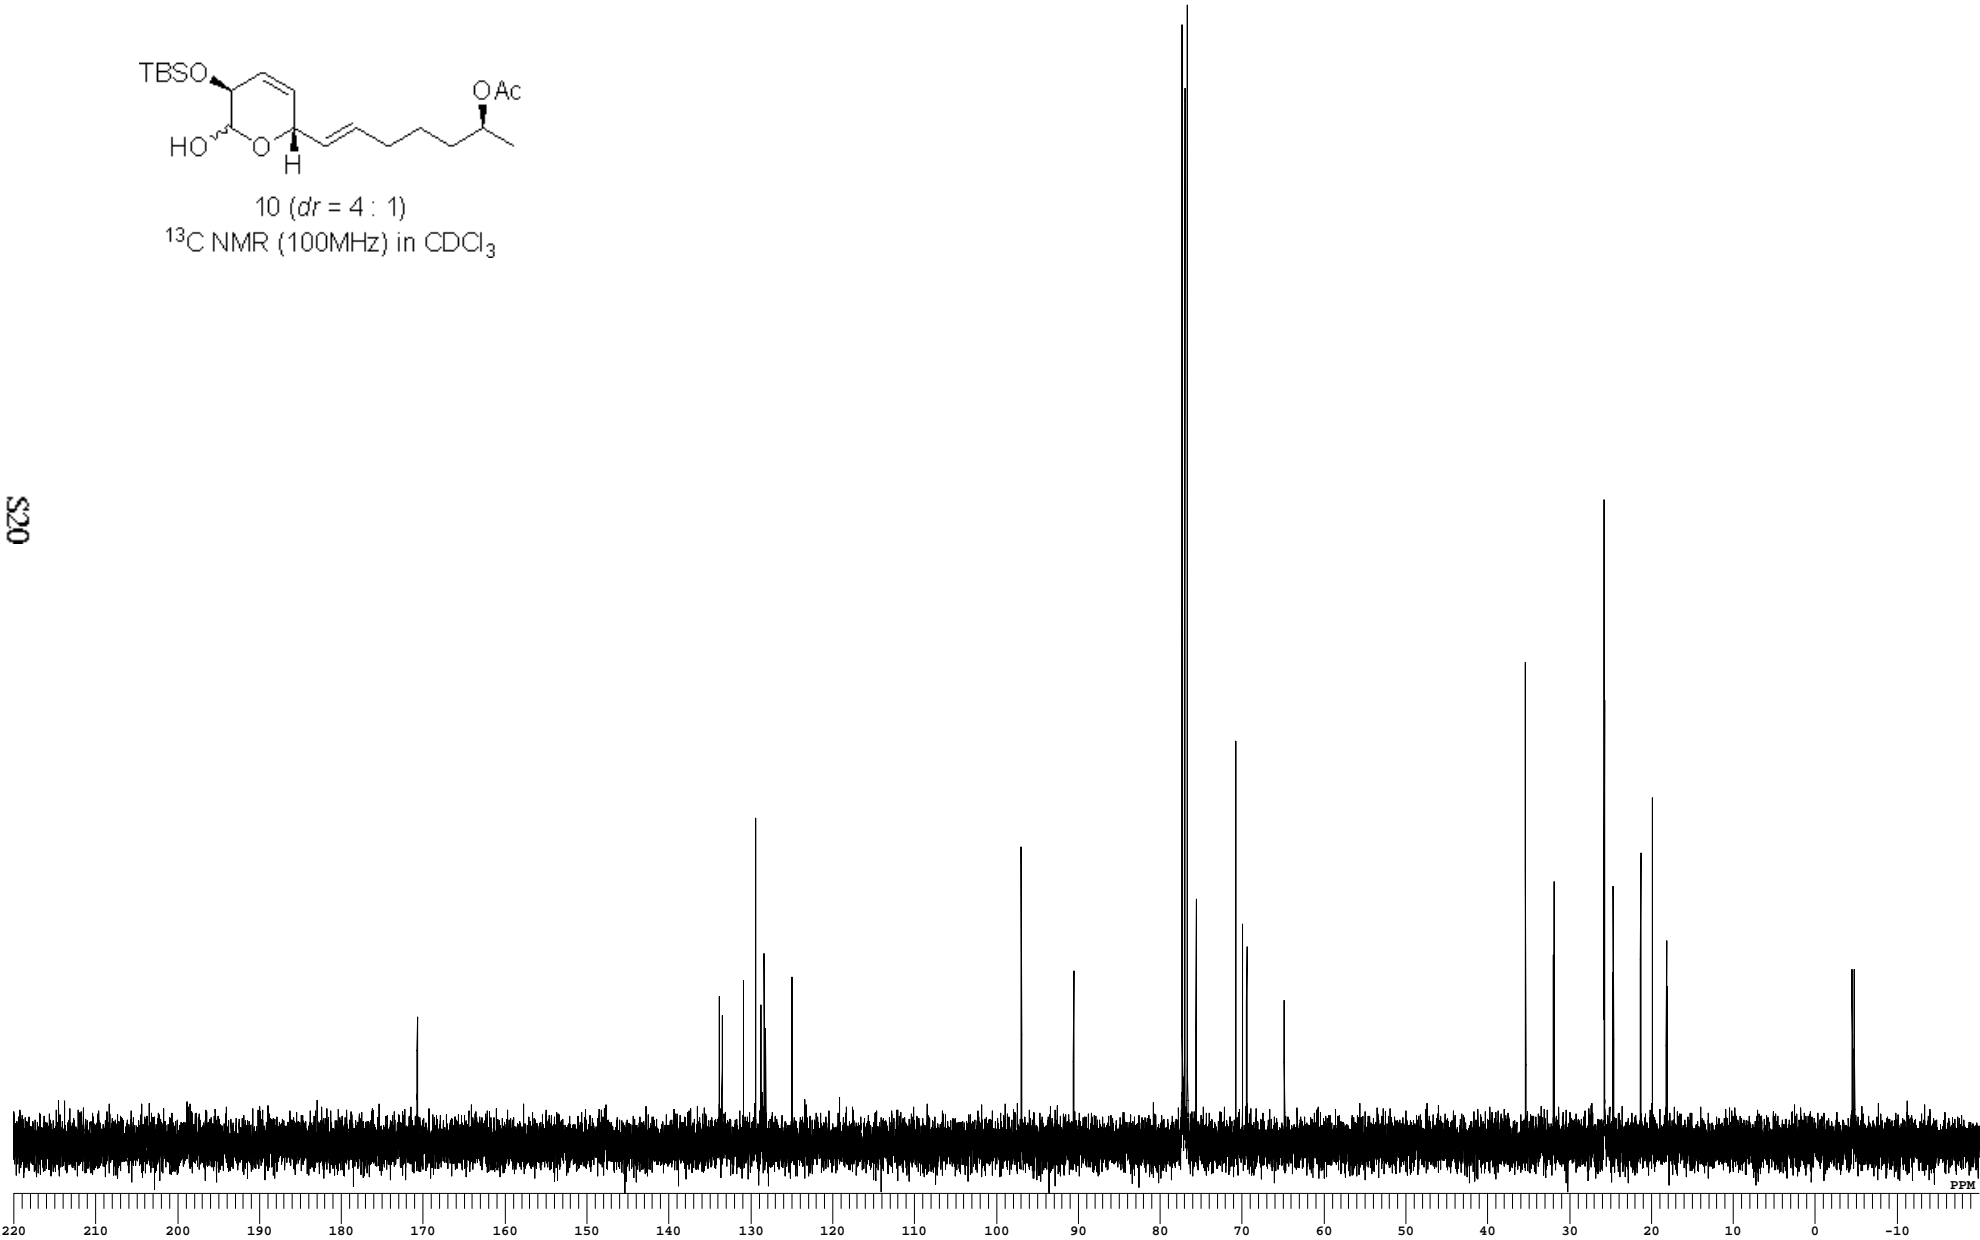

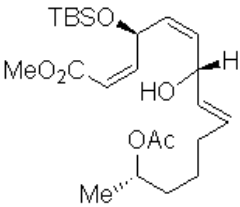

11-Z

$^{13}\text{C}$  NMR (100MHz) in  $\text{CDCl}_3$

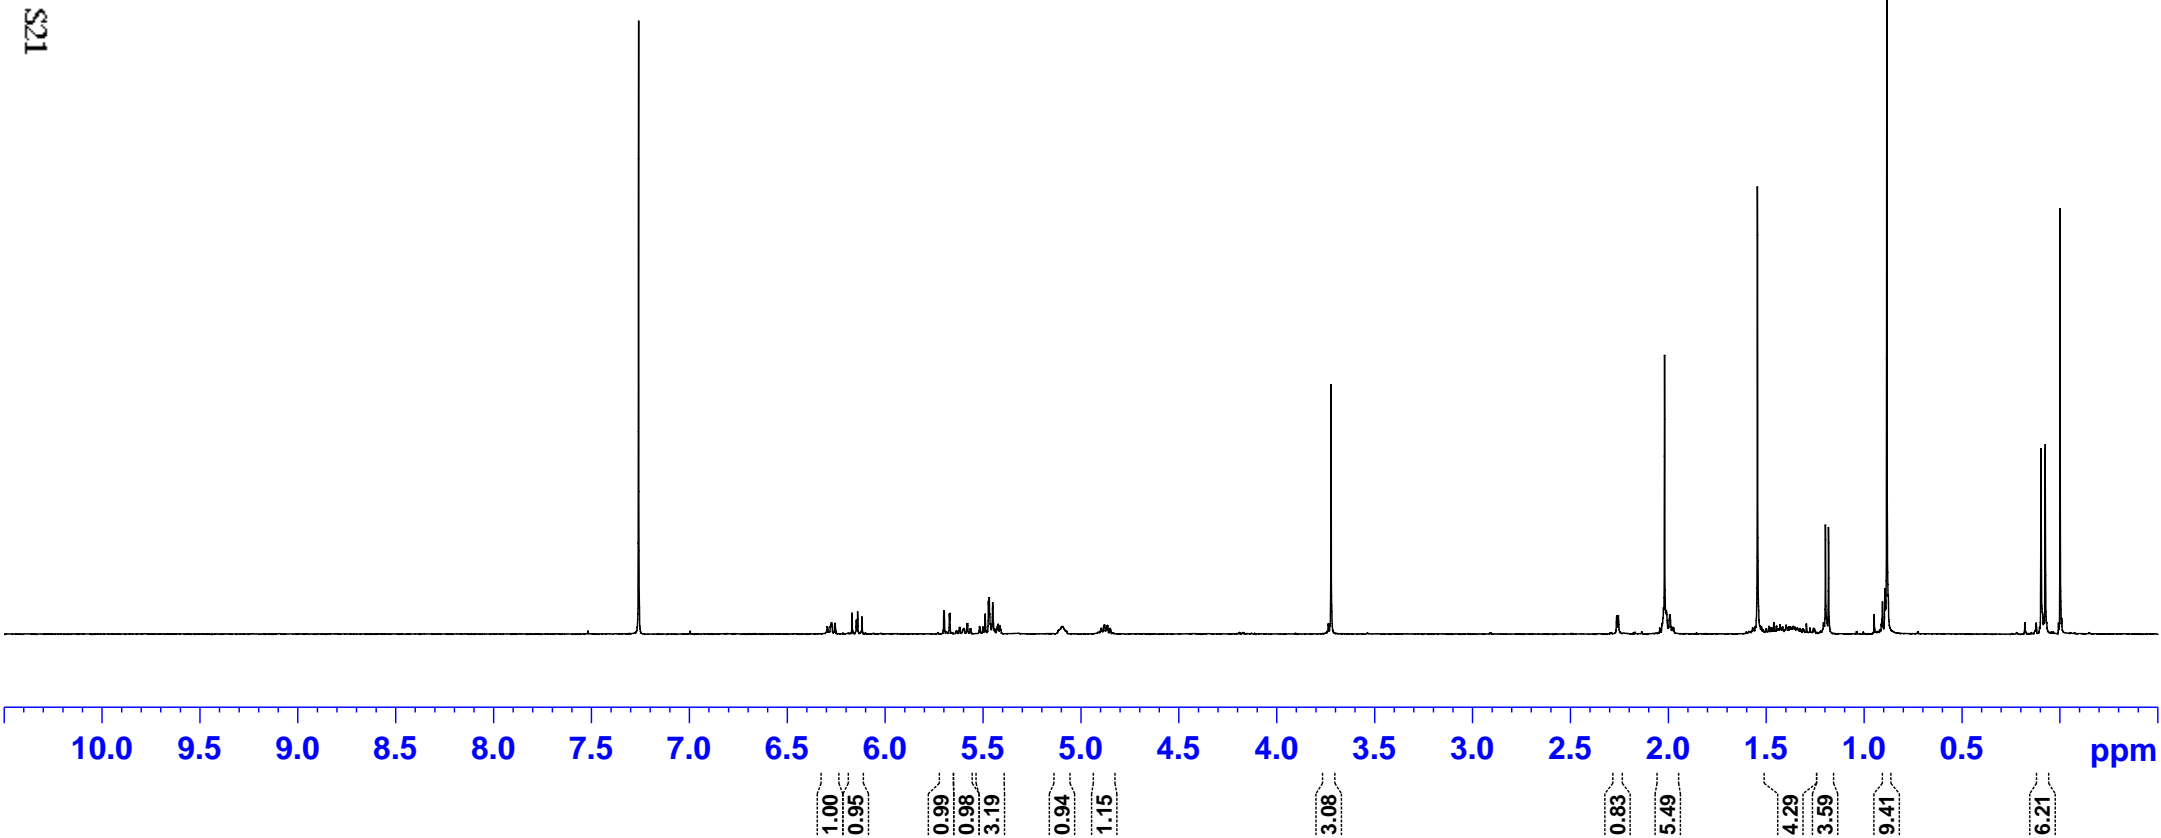

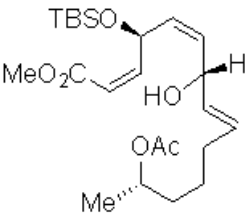

11-Z

<sup>1</sup>H NMR (400MHz) in CDCl<sub>3</sub>

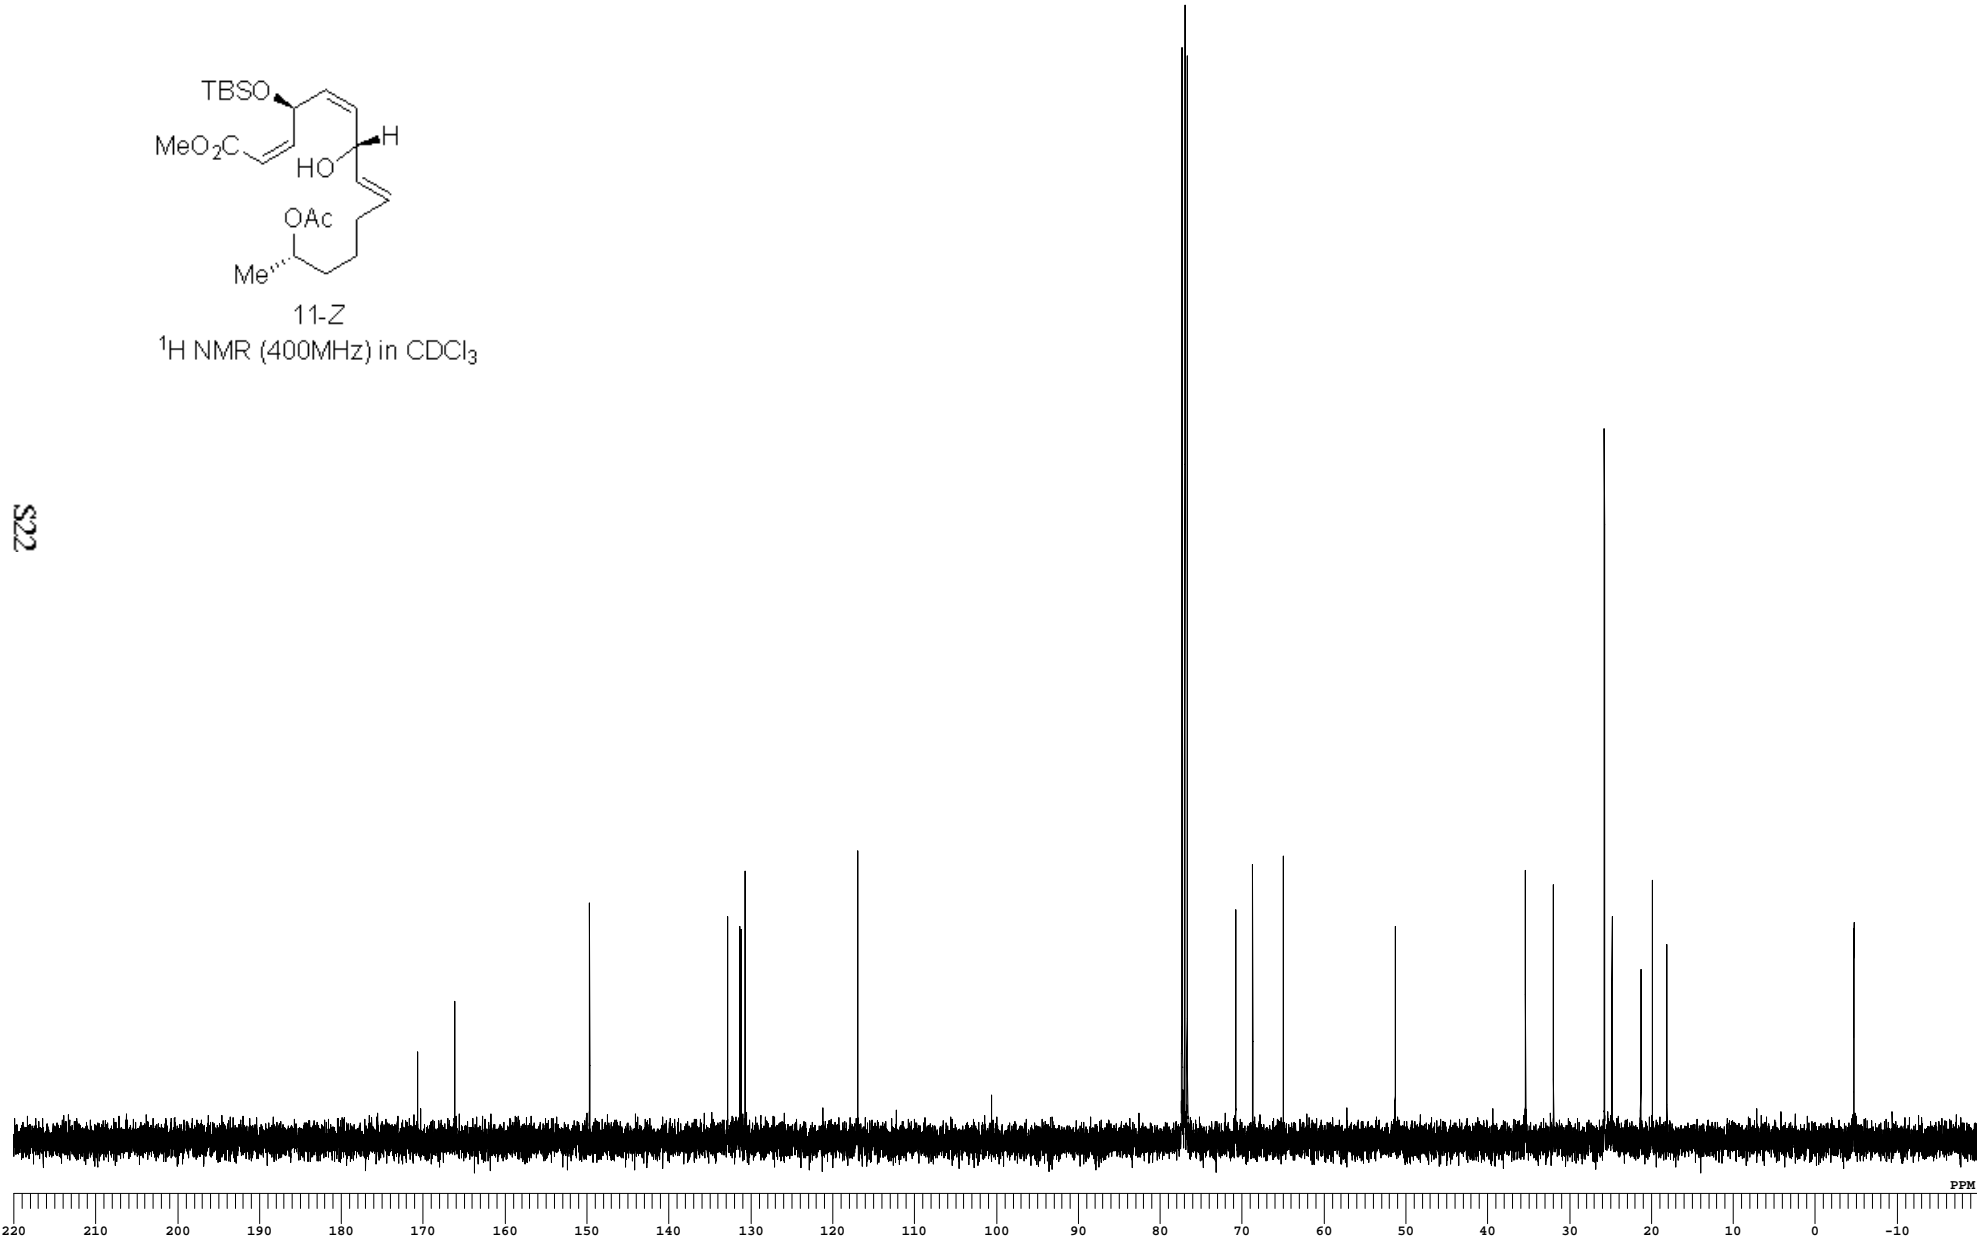

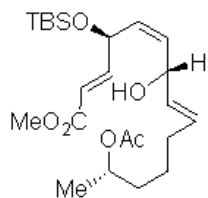

11-*E*

<sup>1</sup>H NMR (400MHz) in CDCl<sub>3</sub>

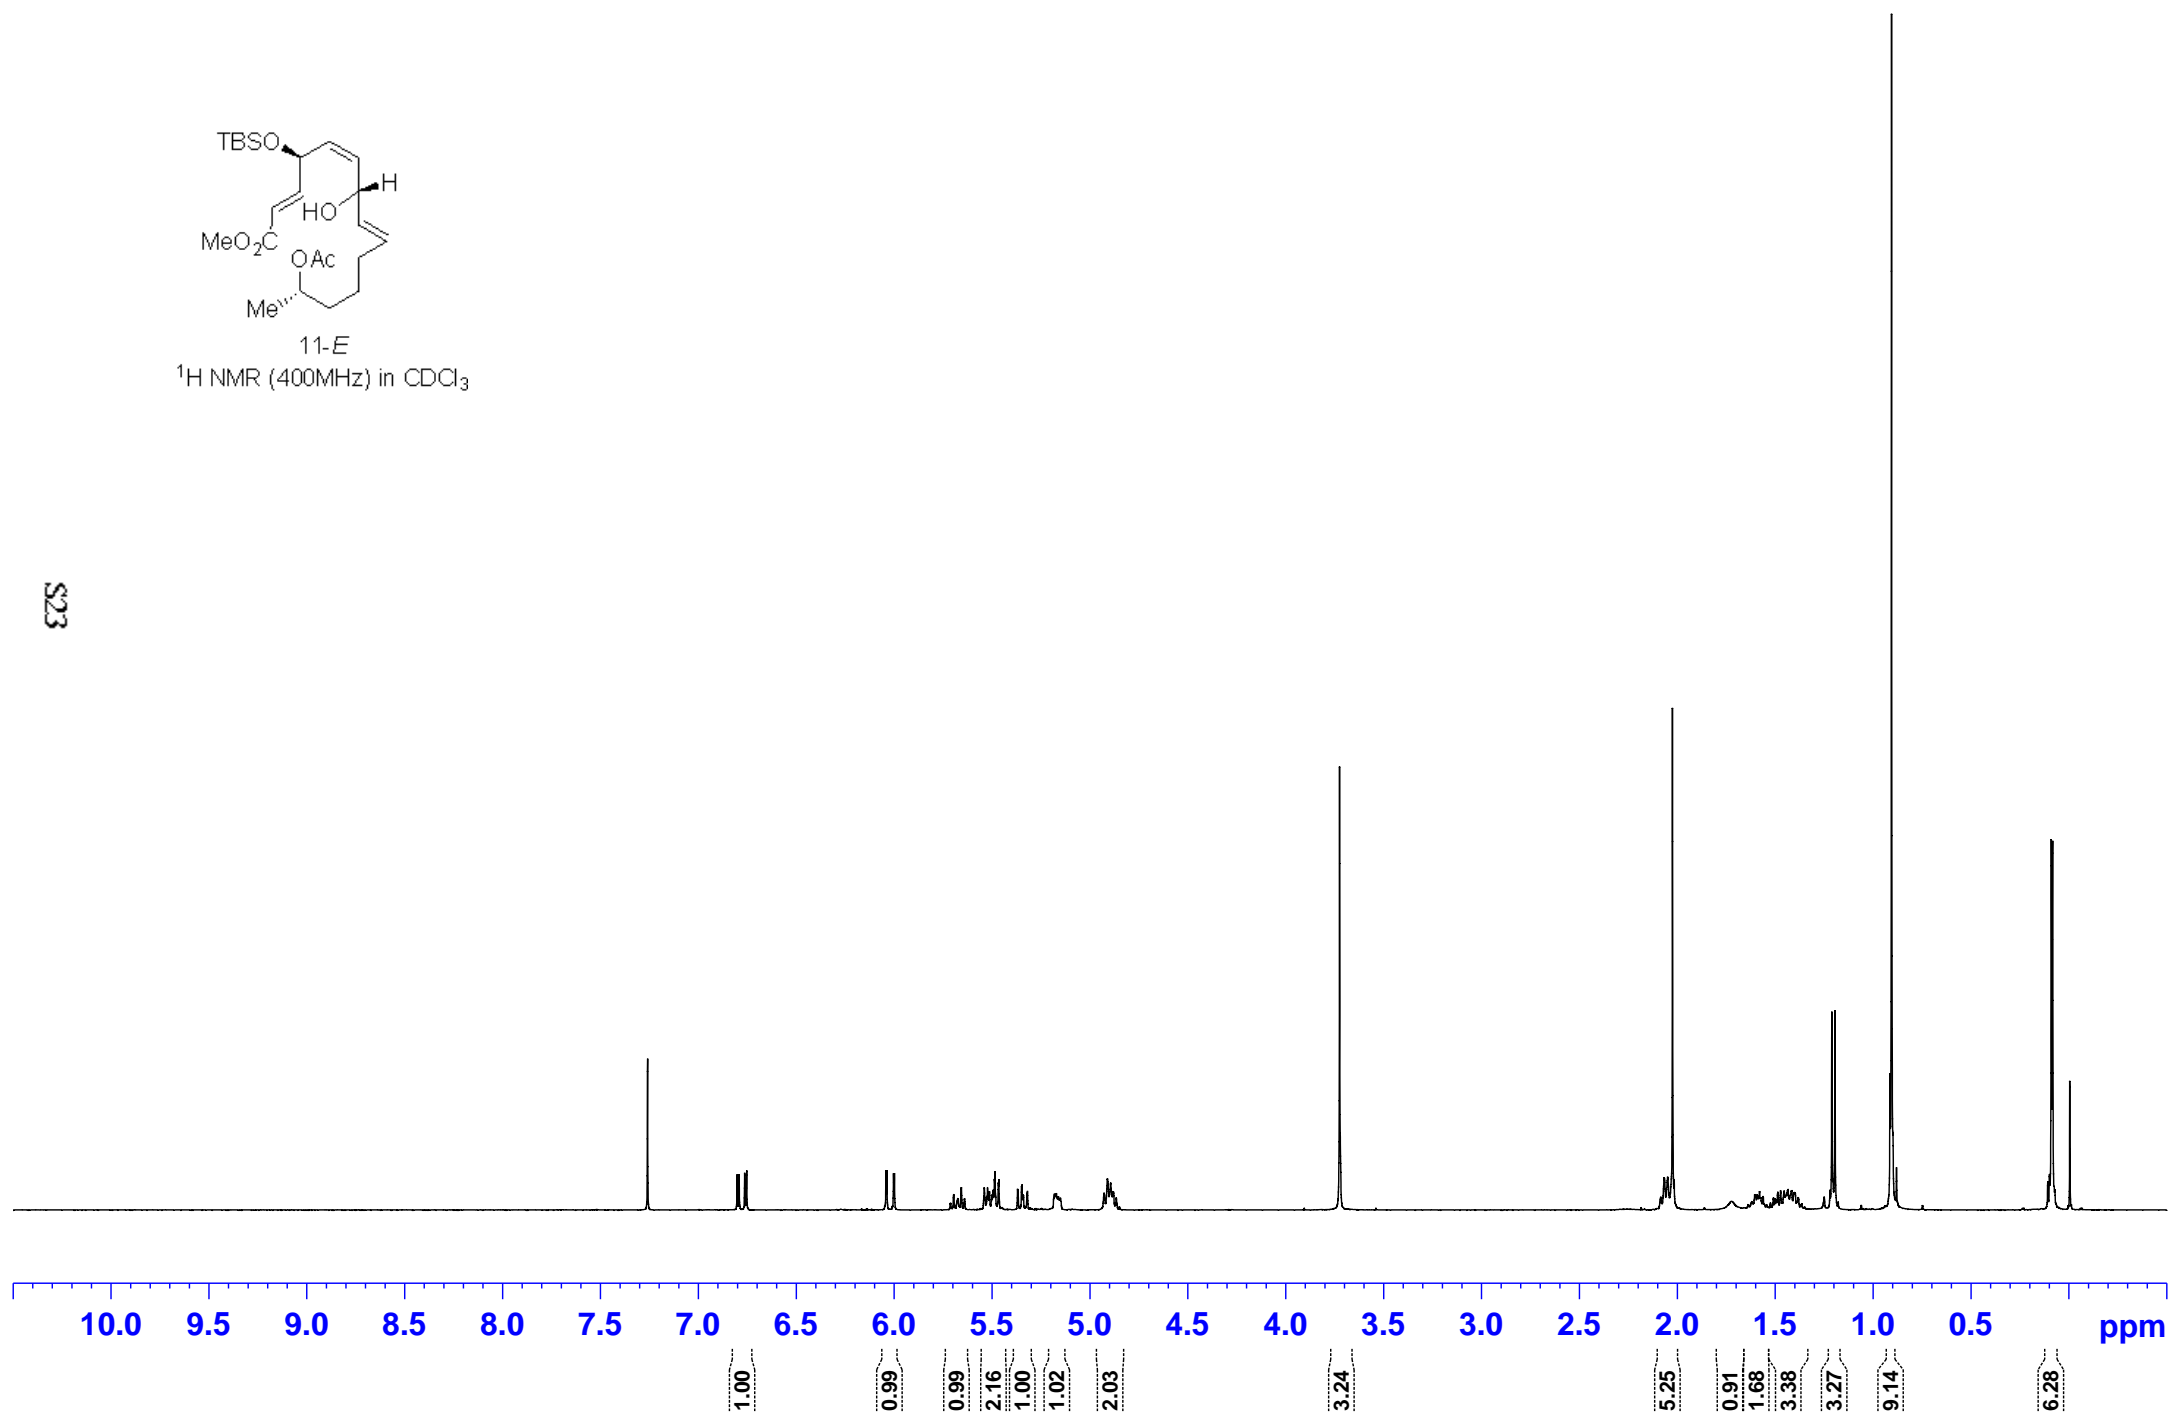

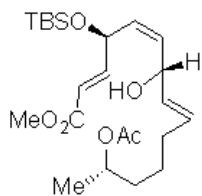

11-E

<sup>13</sup>C NMR (100MHz) in CDCl<sub>3</sub>

S24

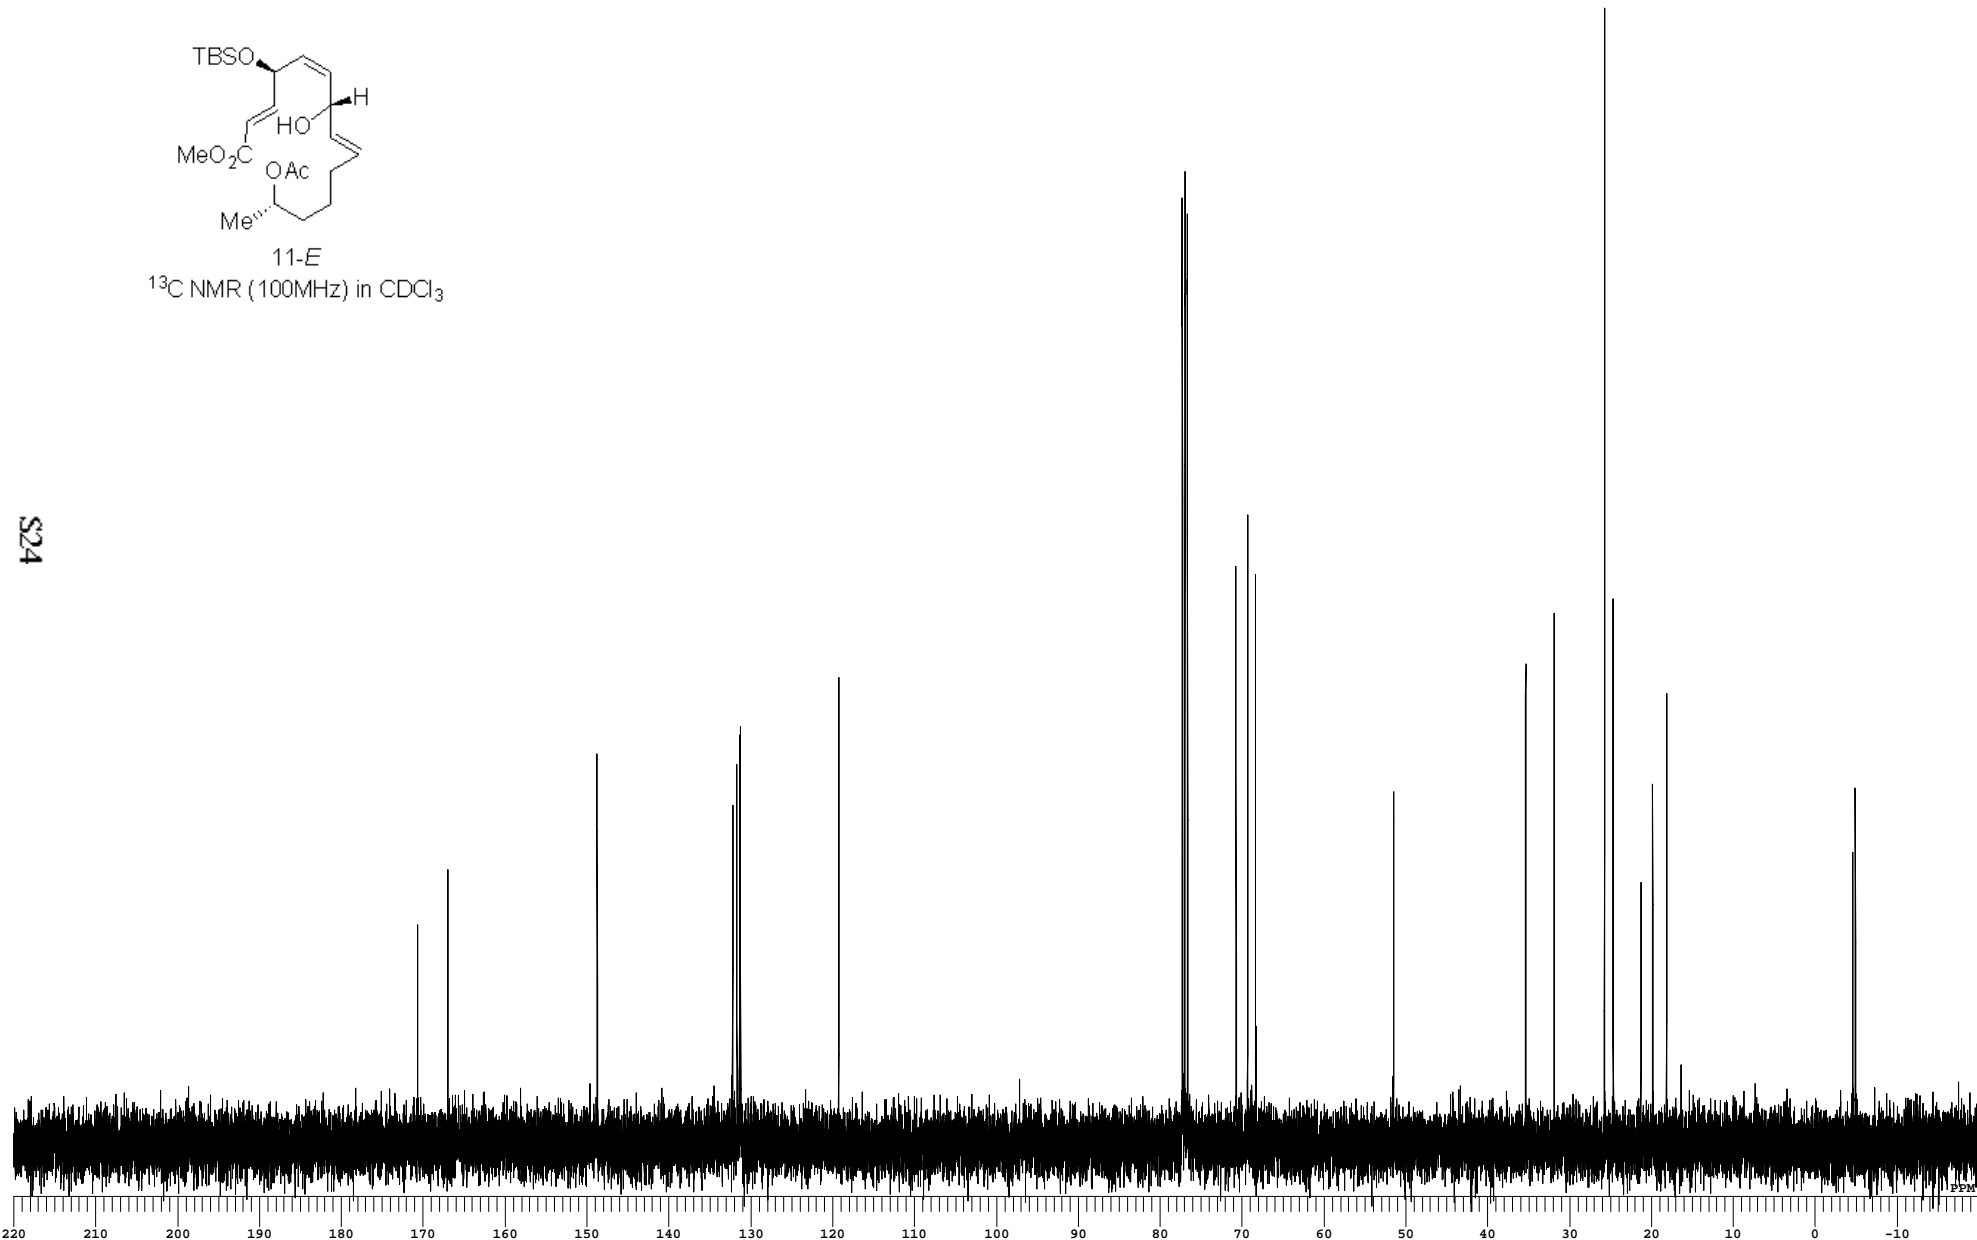

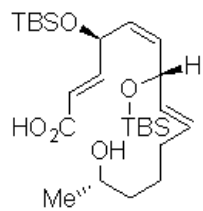

13

<sup>1</sup>H NMR (400MHz) in CDCl<sub>3</sub>

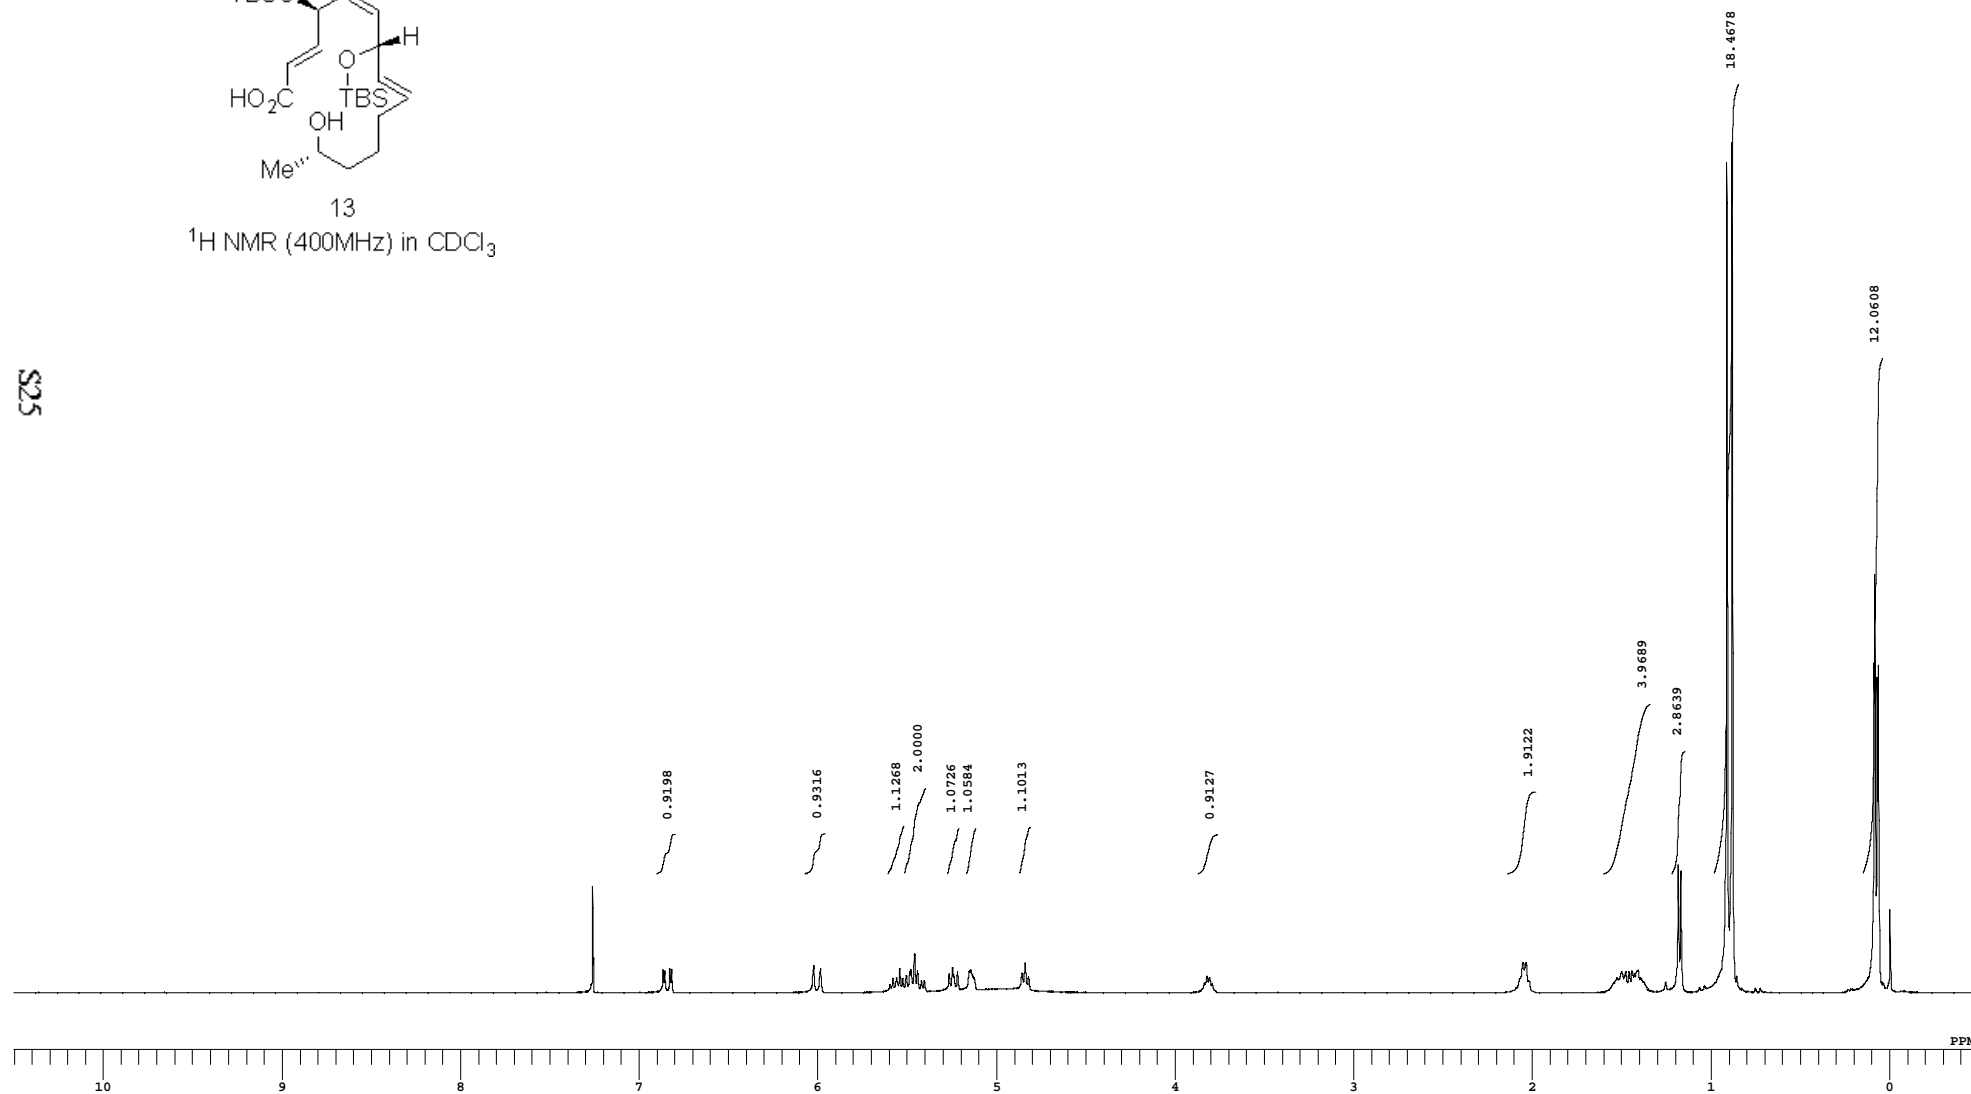

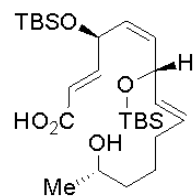

13

$^{13}\text{C}$  NMR (100MHz) in  $\text{CDCl}_3$

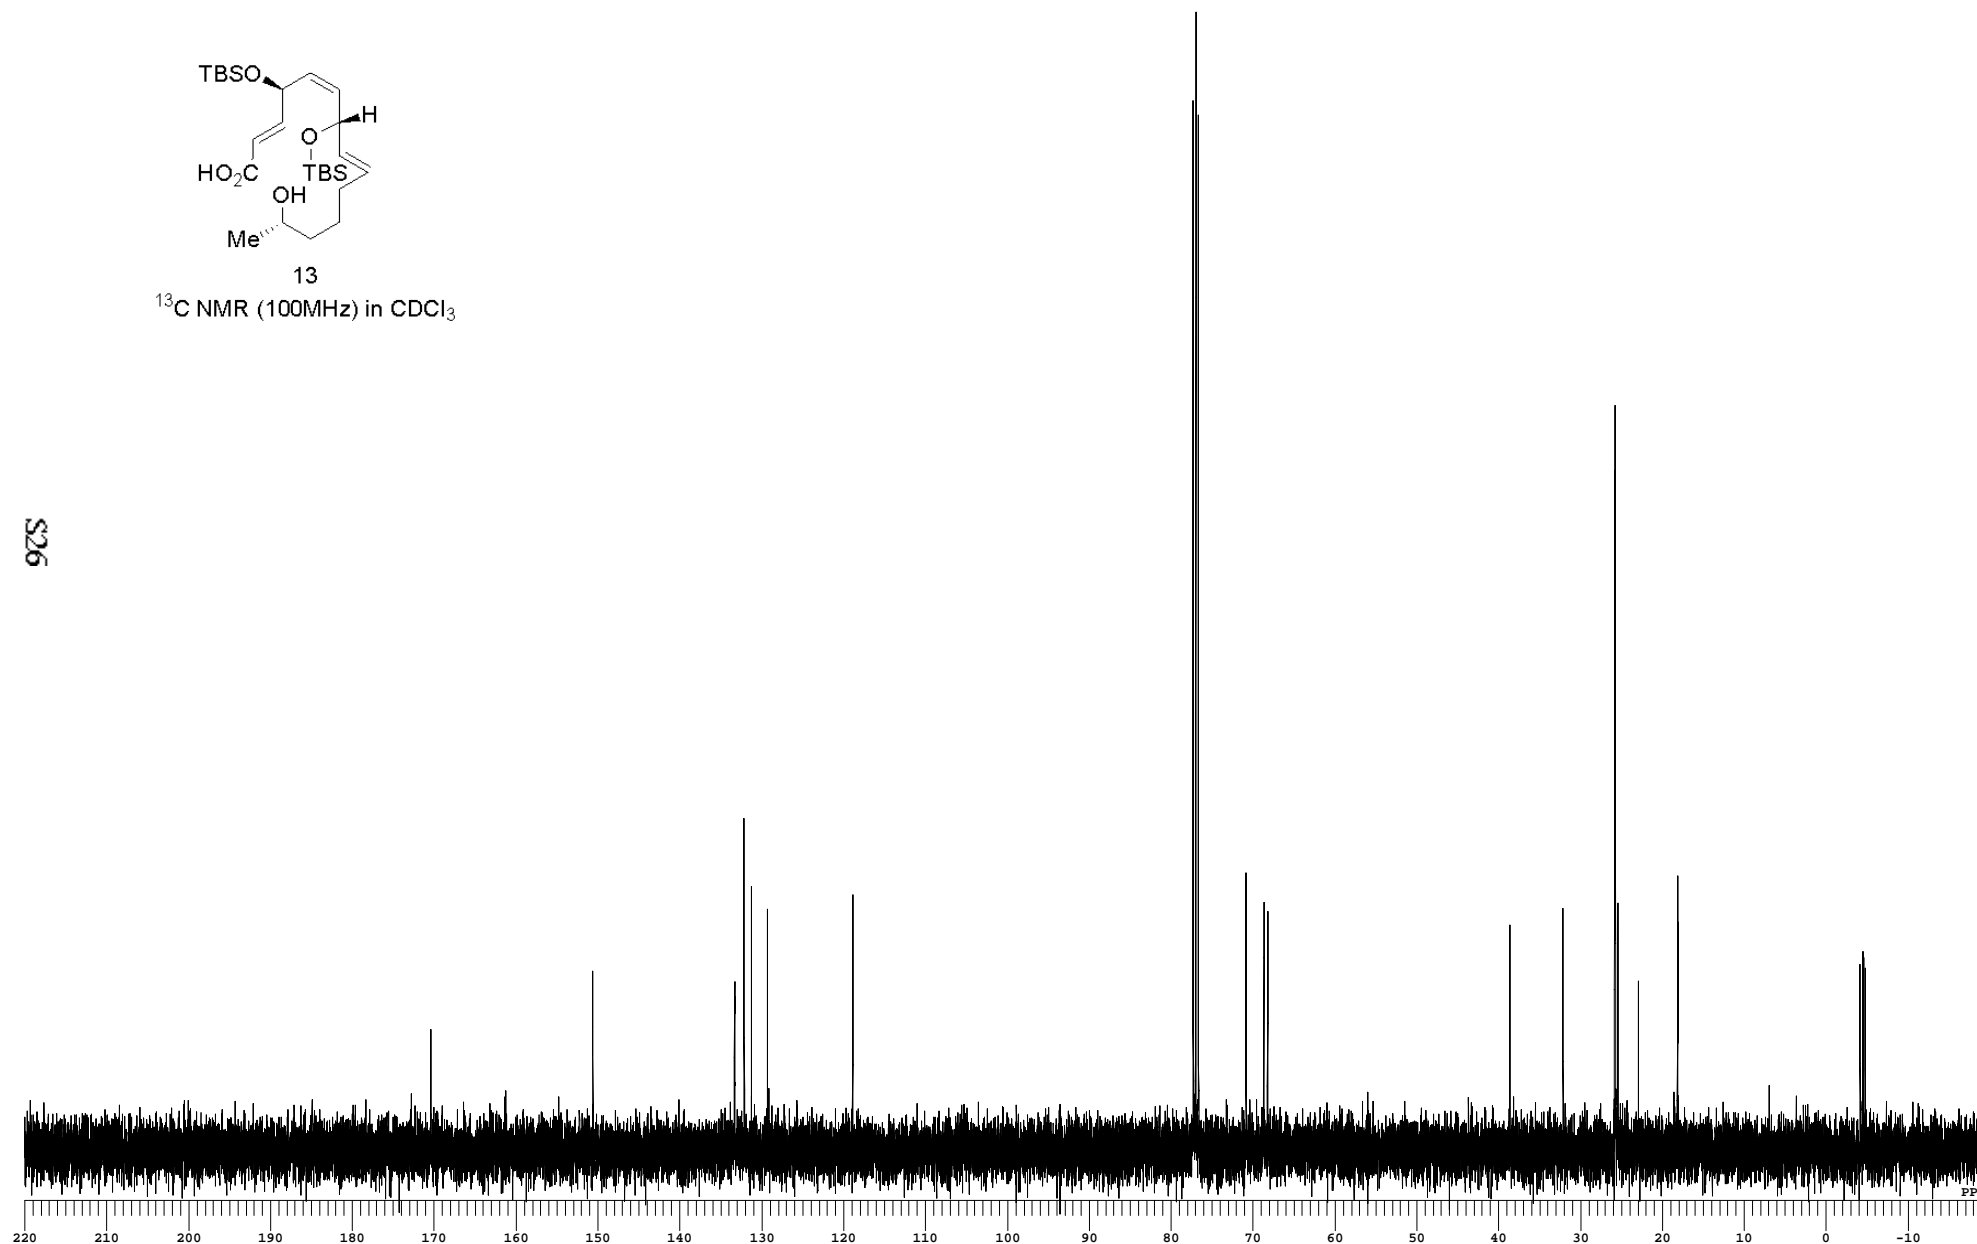

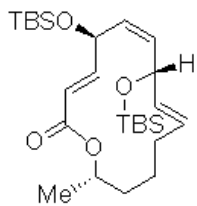

14

$^1\text{H}$  NMR (400MHz) in  $\text{CDCl}_3$

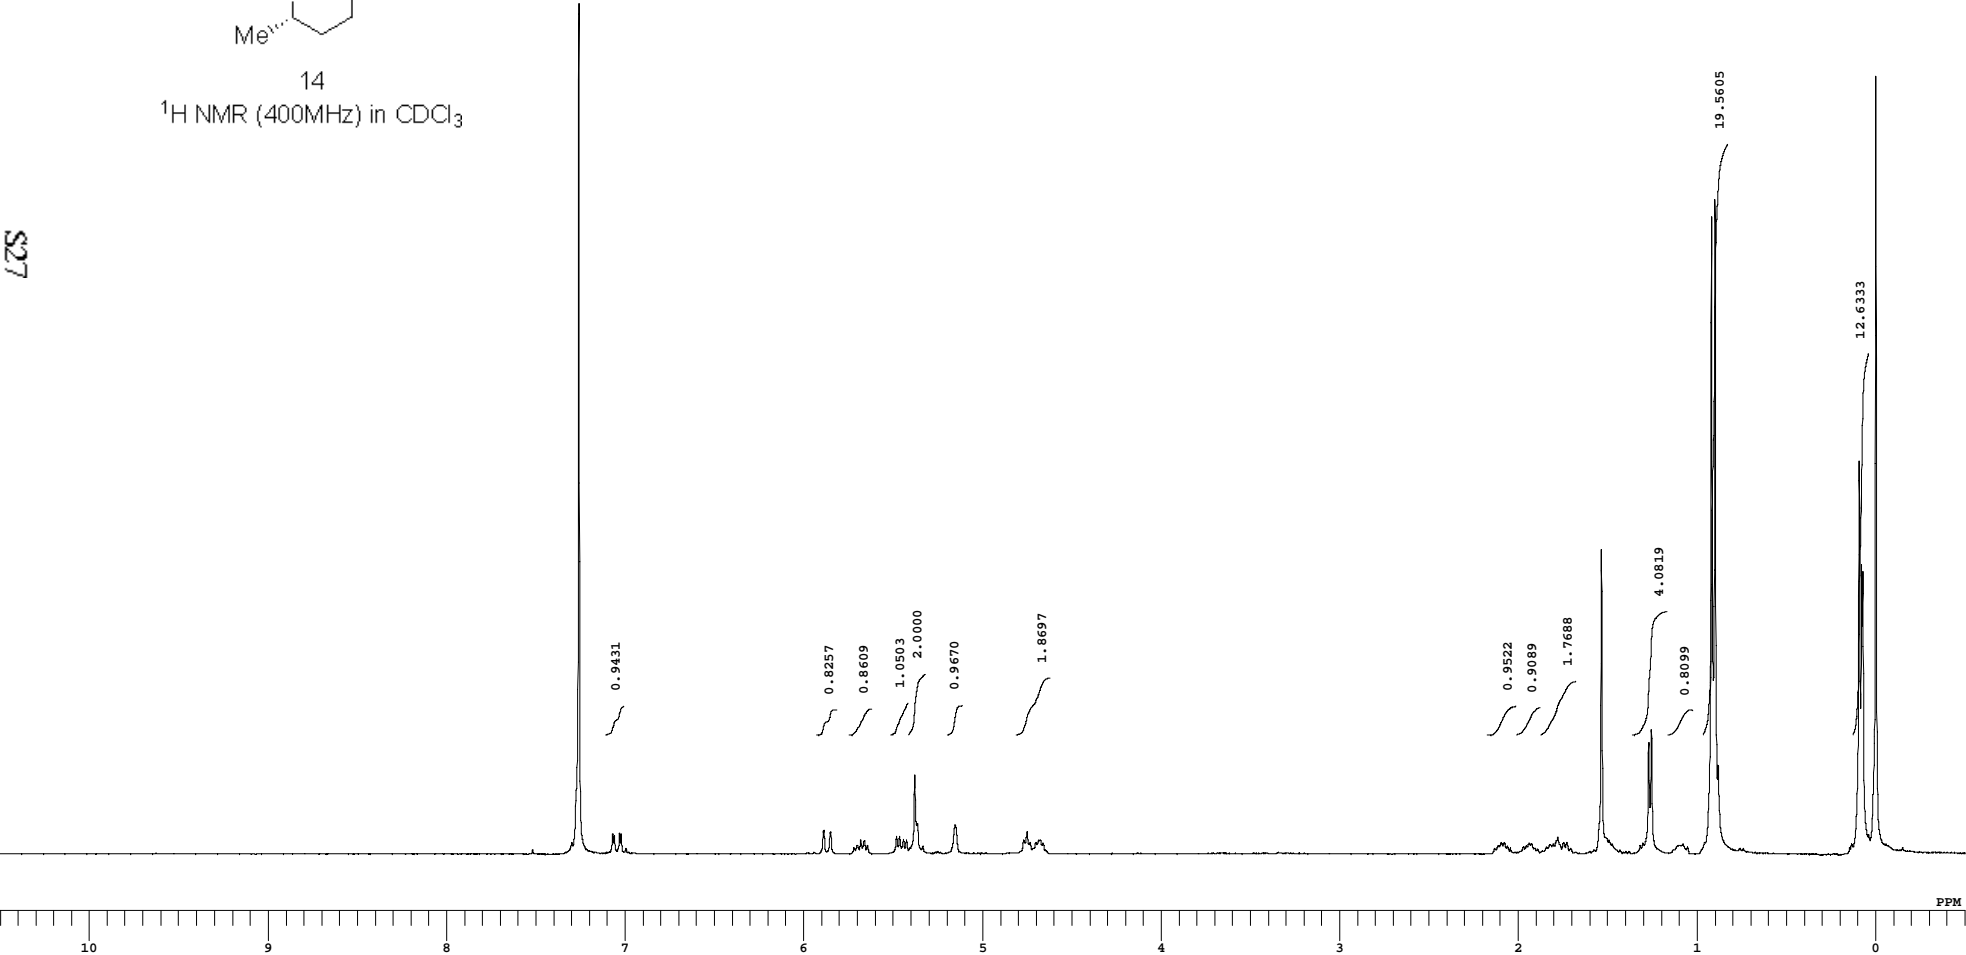

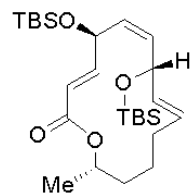

14

<sup>13</sup>C NMR (100MHz) in CDCl<sub>3</sub>

S28

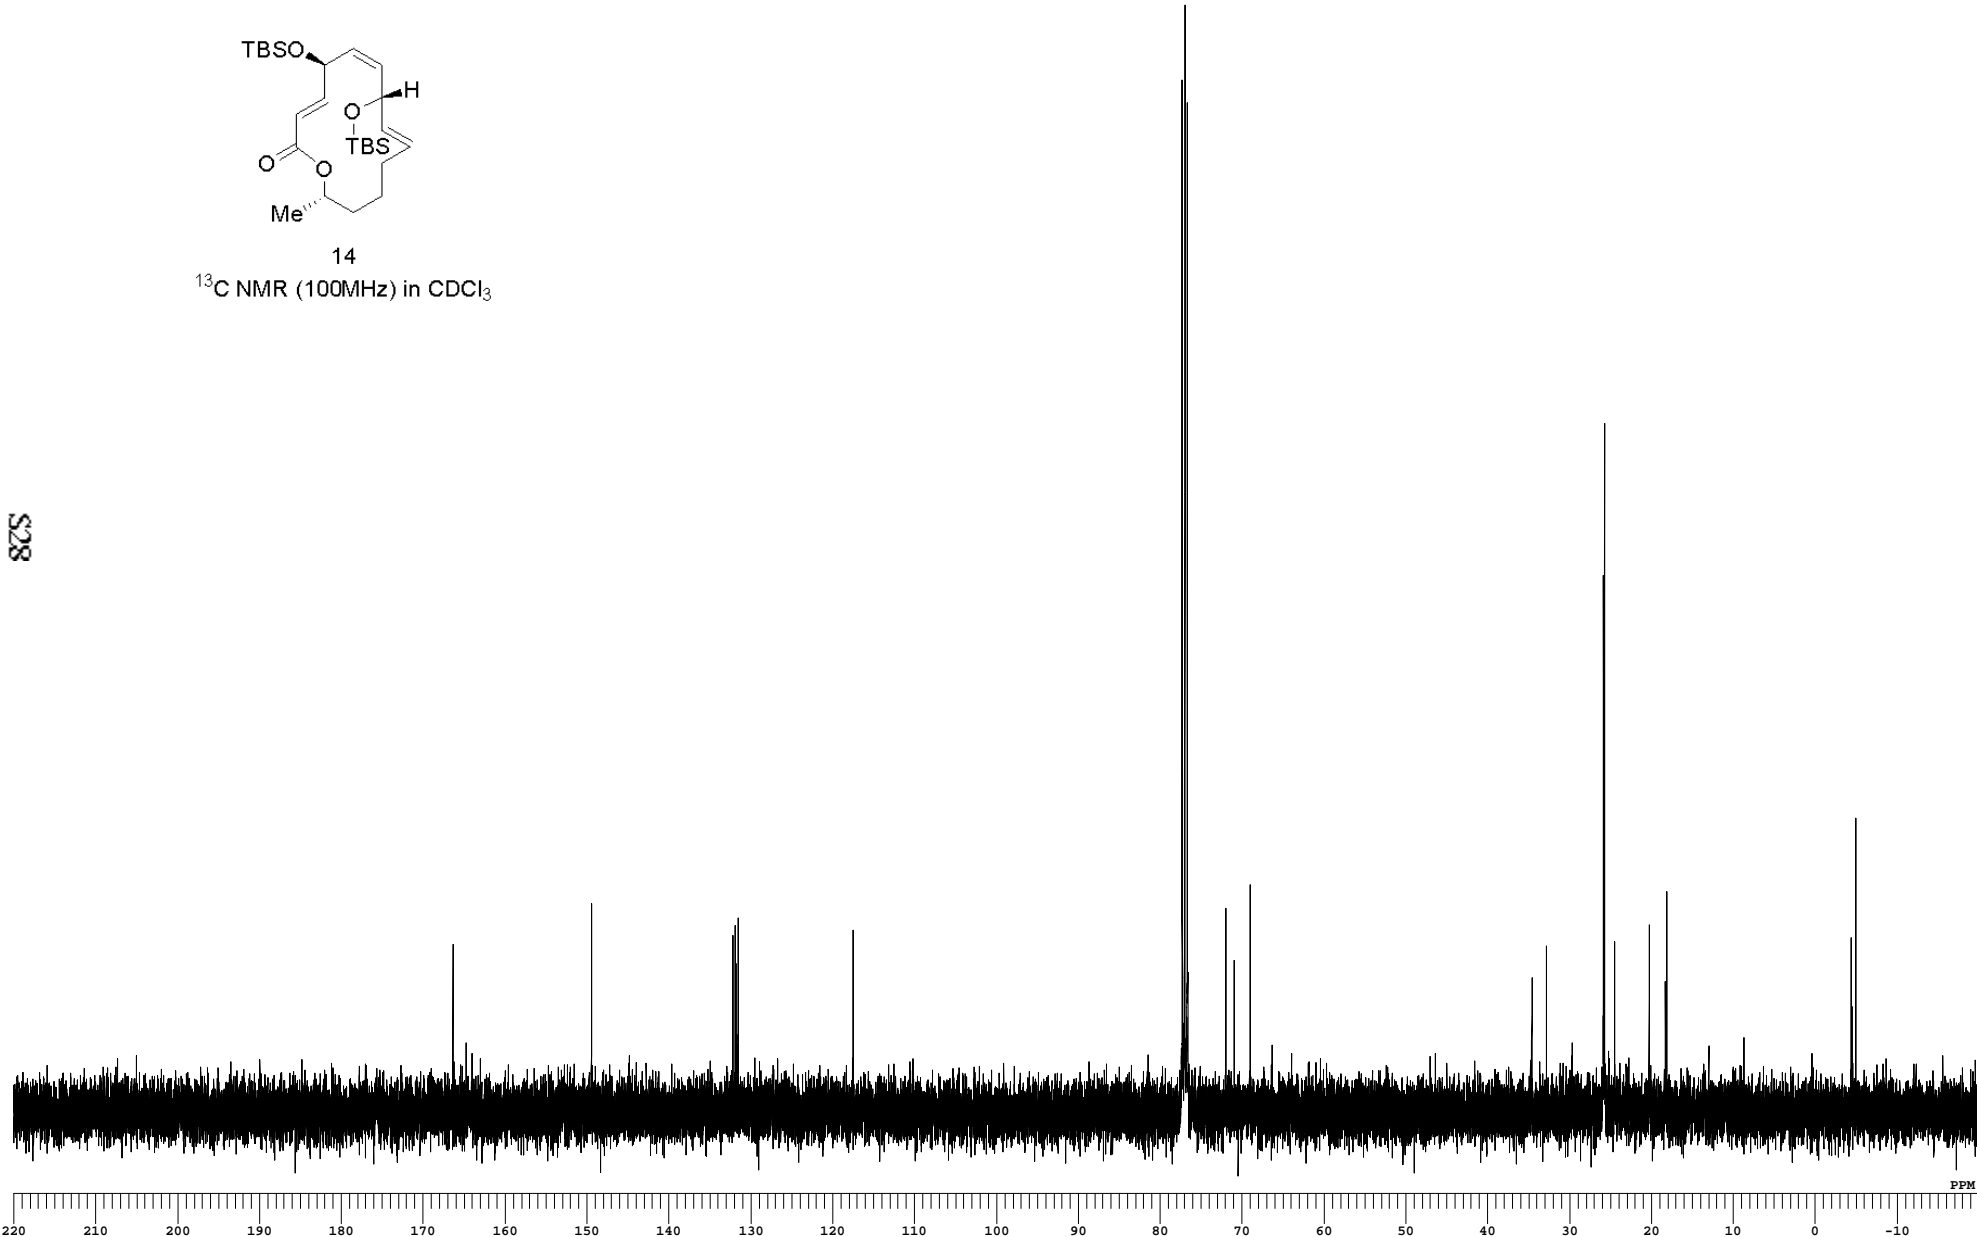

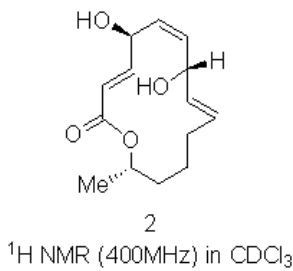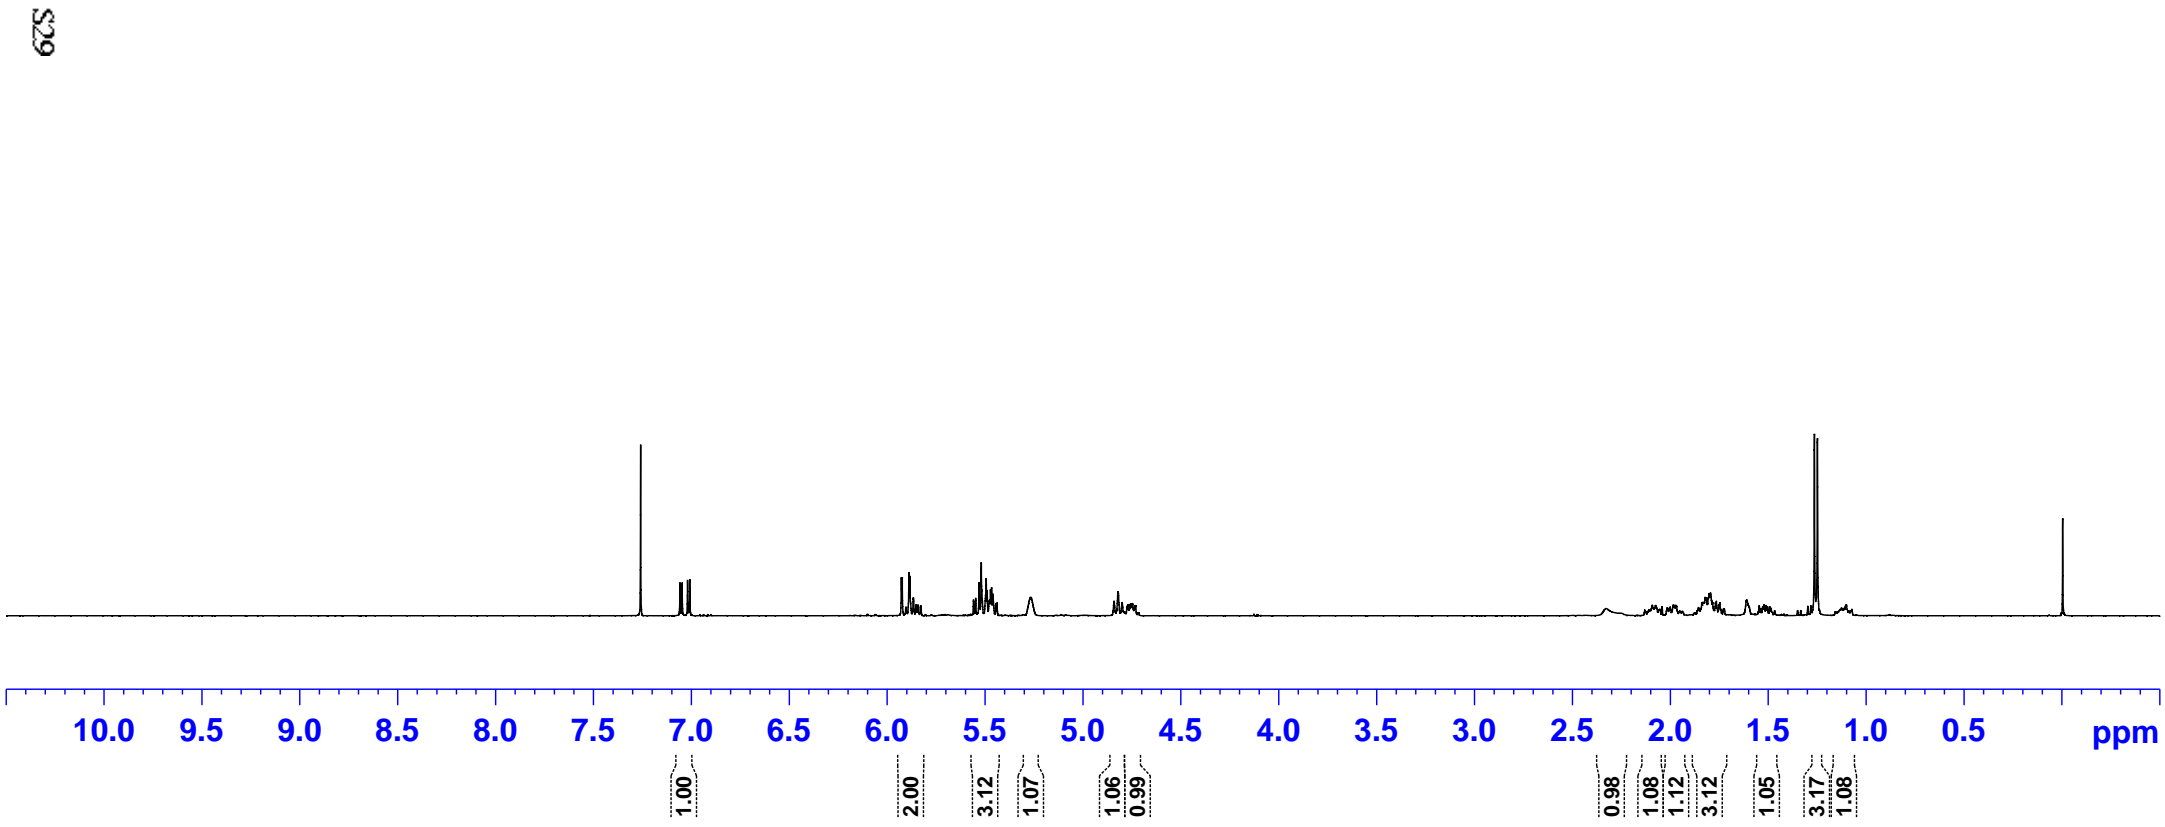

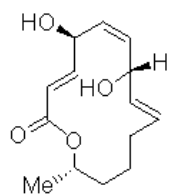

2

<sup>13</sup>C NMR (100MHz) in CDCl<sub>3</sub>

S30

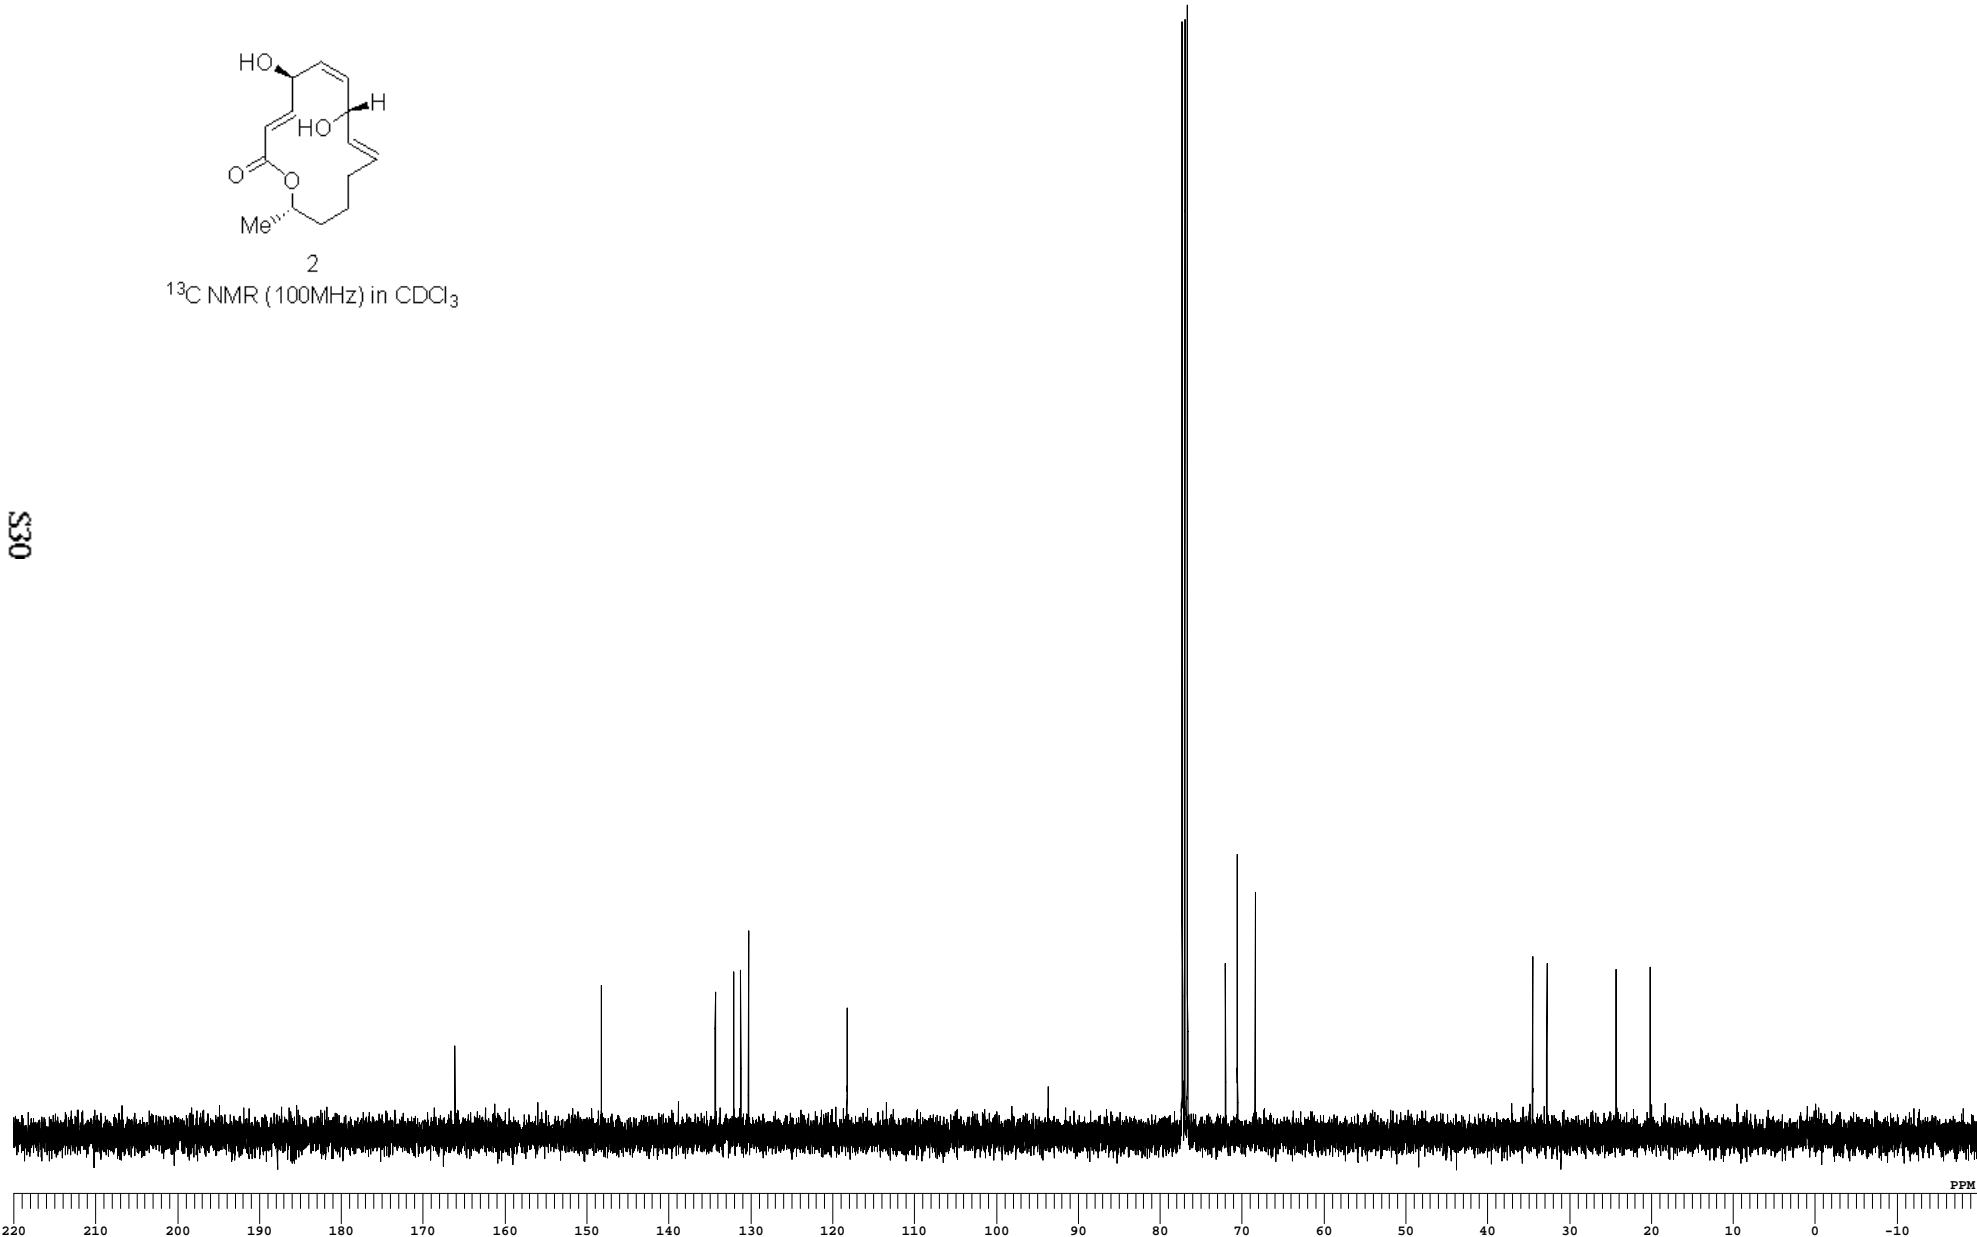

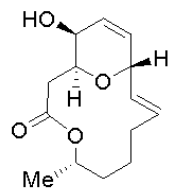

1

<sup>1</sup>H NMR (500MHz) in C<sub>6</sub>D<sub>6</sub>

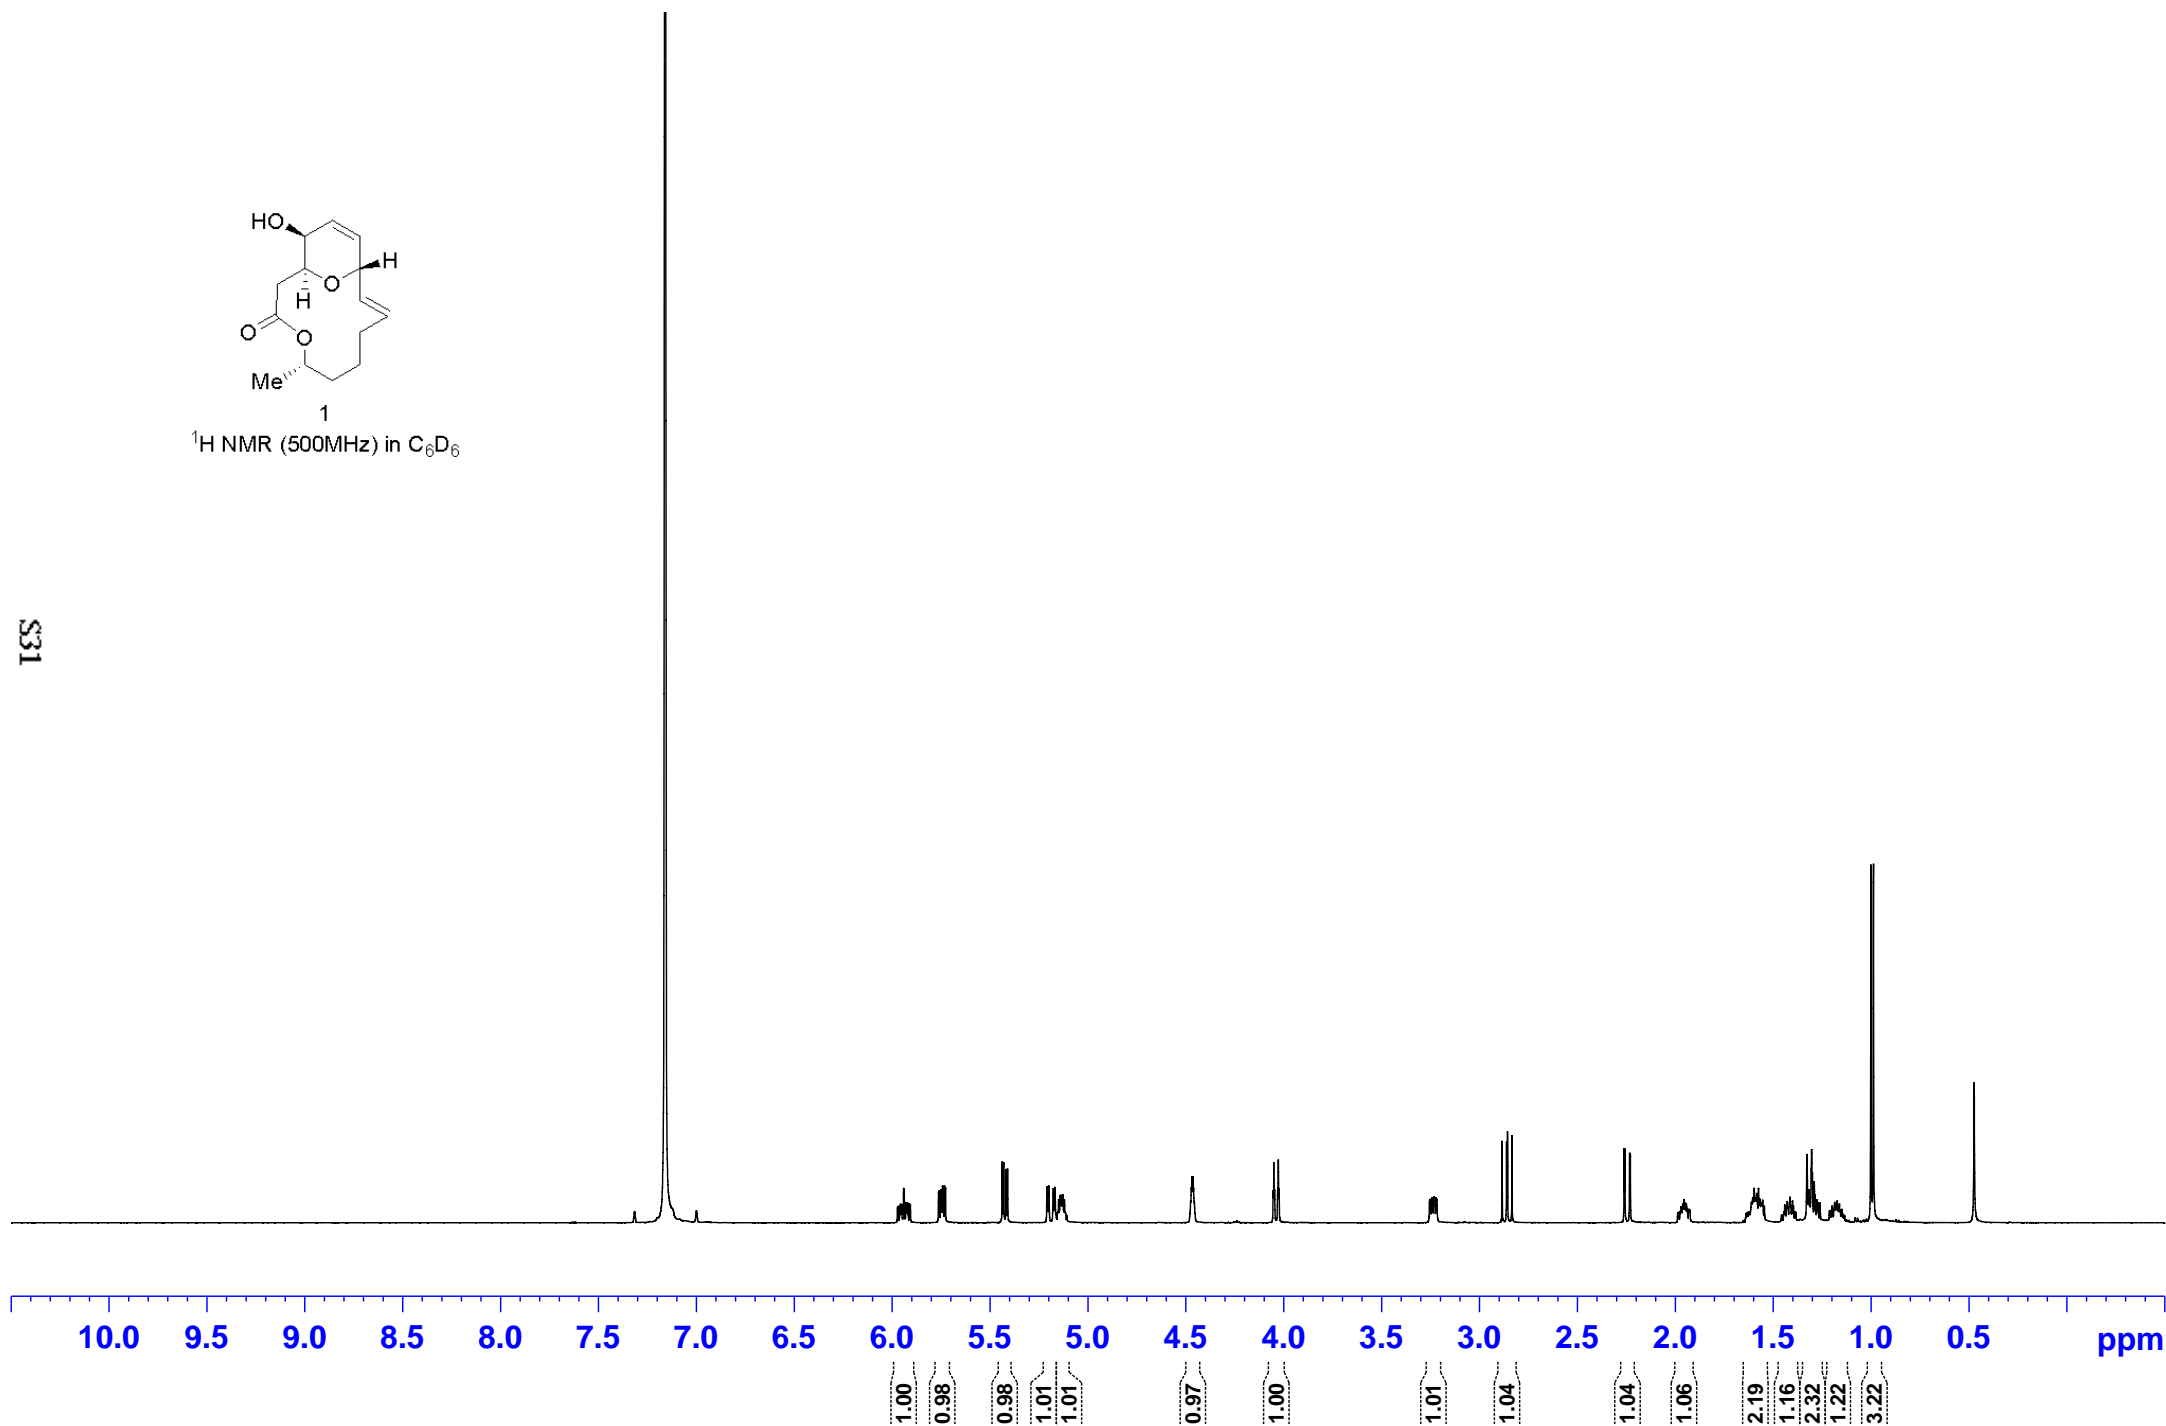

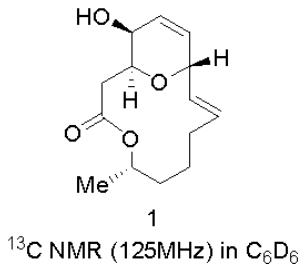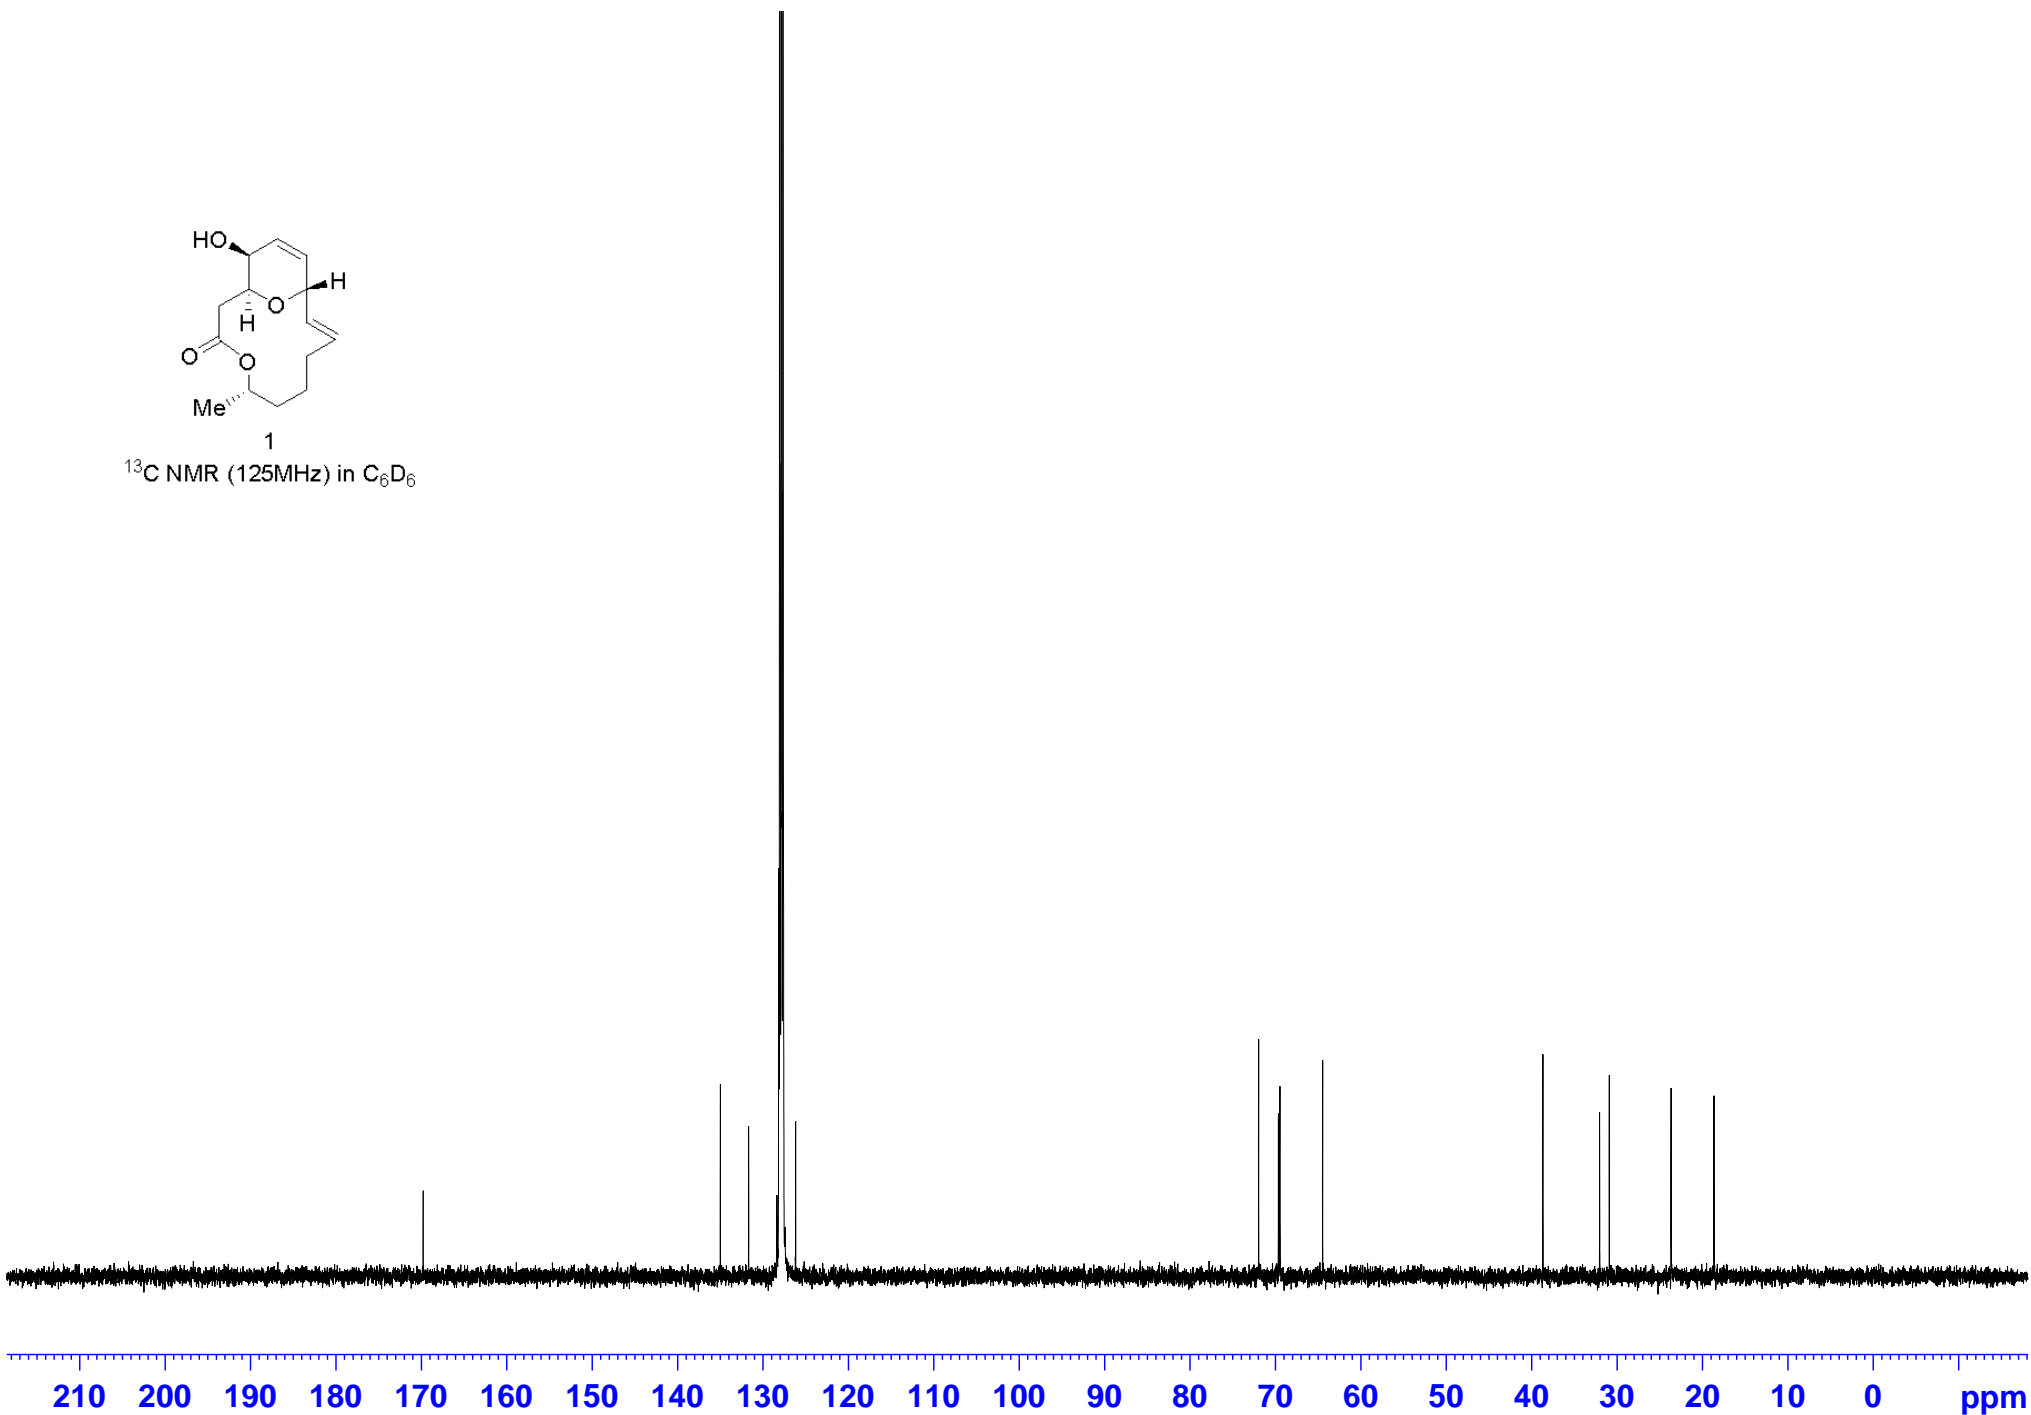

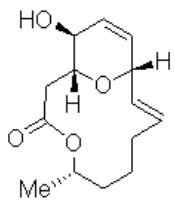

15

<sup>1</sup>H NMR (500MHz) in CDCl<sub>3</sub>

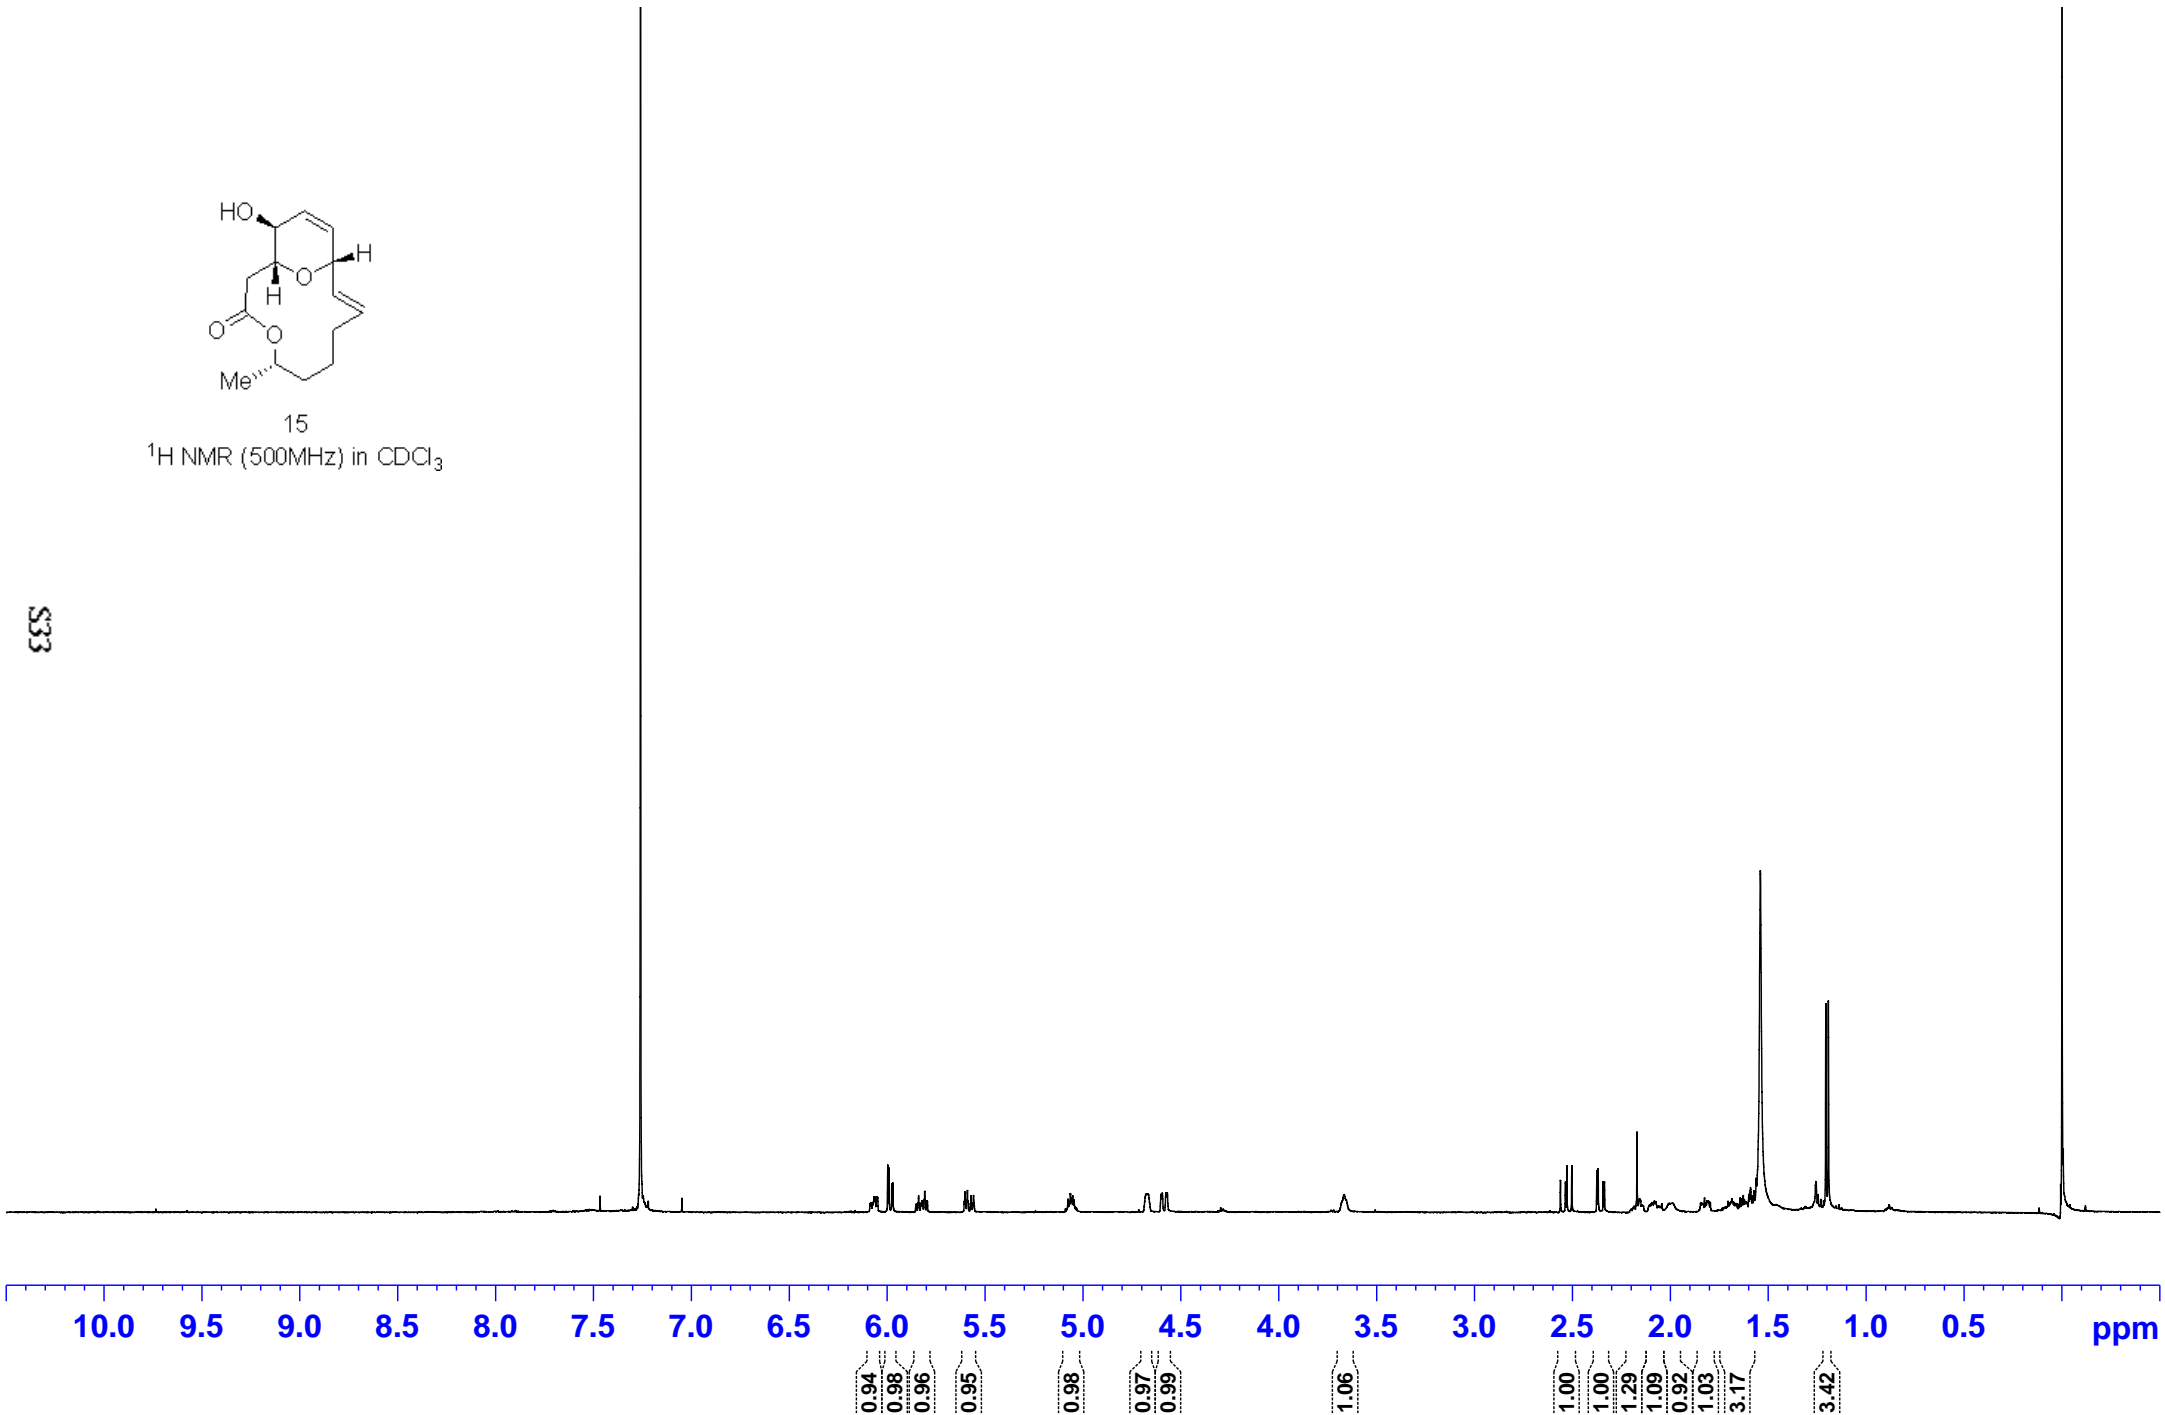

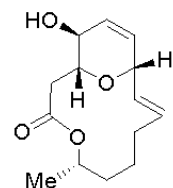

15

<sup>1</sup>H NMR (100MHz) in CDCl<sub>3</sub>

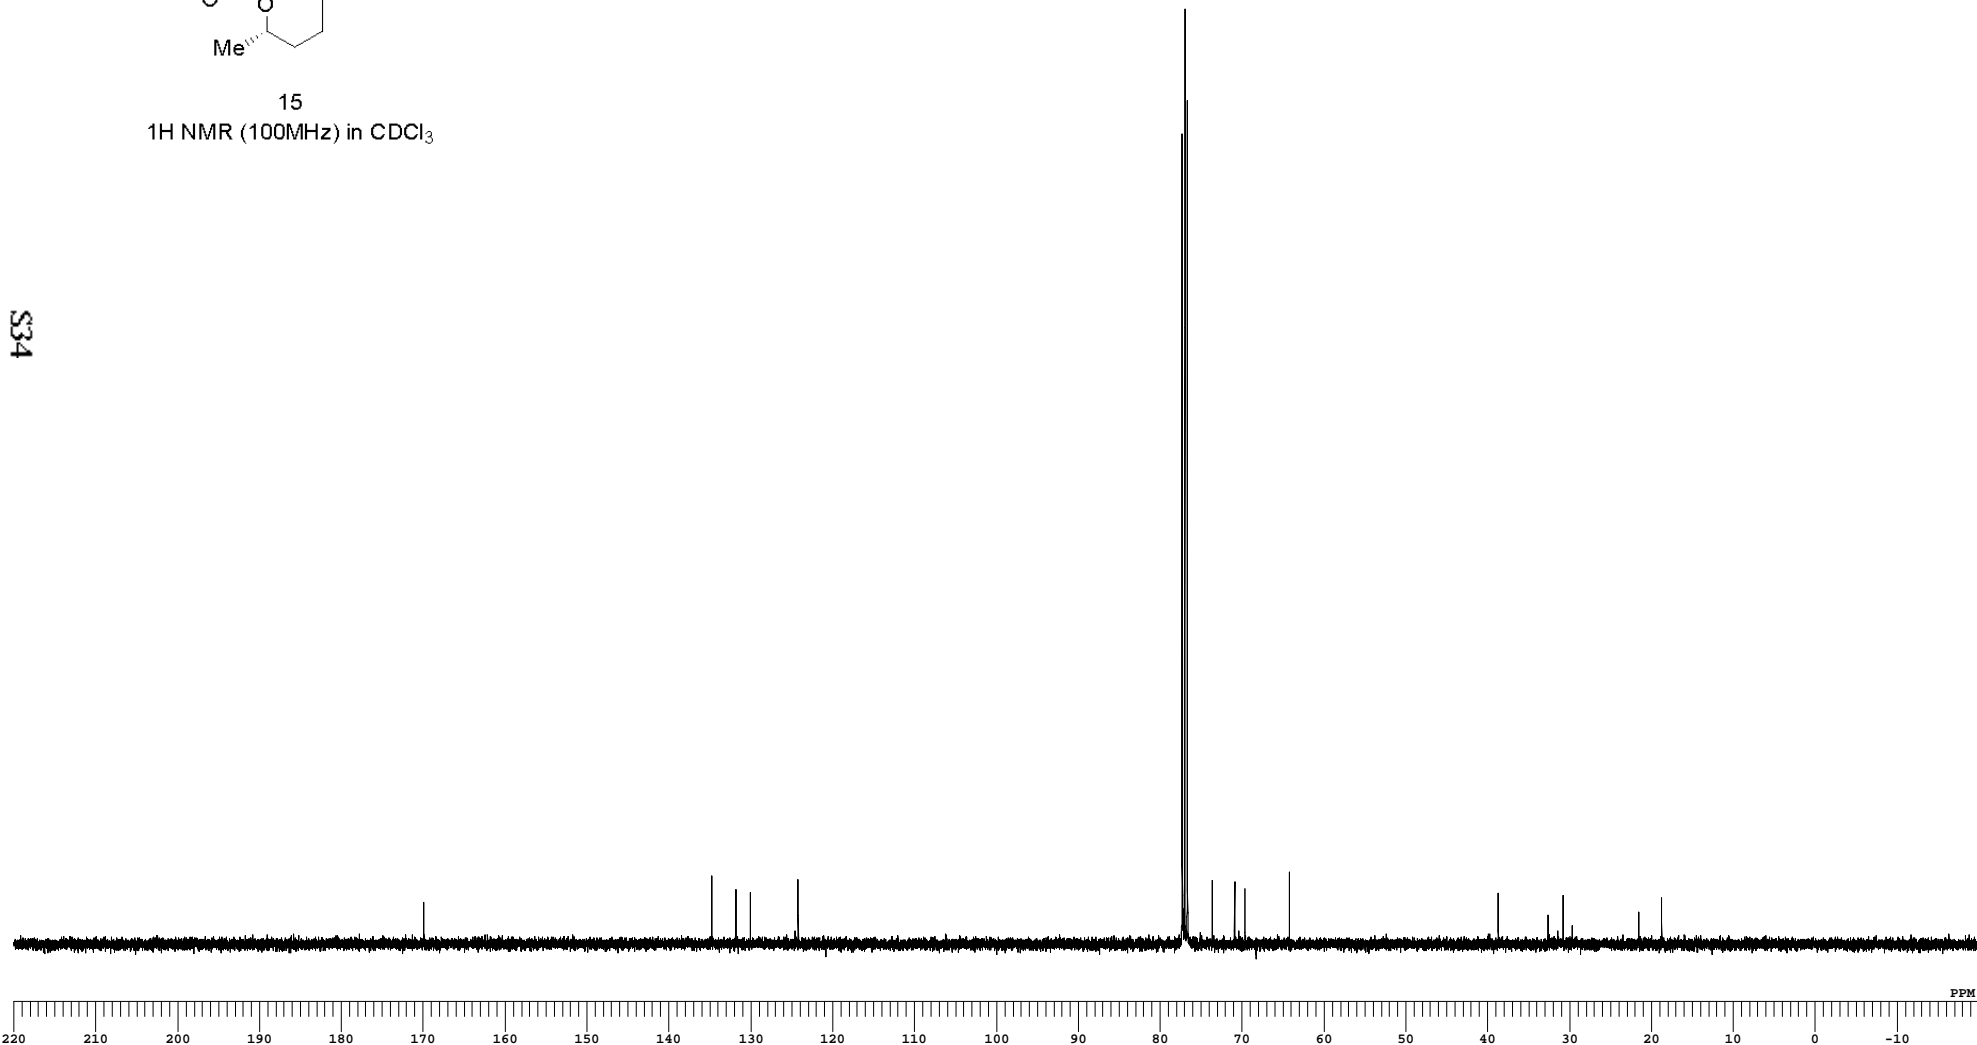

Supplement: c1cc12114f.pdf [file c1cc12114f.pdf]
